# 1 Targeted cortical stimulation reveals 2 principles of cortical contextual 3 interactions

4 **Shen Wang**<sup>1,2</sup>, **Agostina Palmigiano**<sup>4</sup>, **Kenneth D. Miller**<sup>4,5</sup>, **Stephen D. Van**  
5 **Hooser**<sup>1,2,3</sup>

\*For correspondence:  
[vanhoosr@brandeis.edu](mailto:vanhoosr@brandeis.edu) (SVH)

6 <sup>1</sup>Department of Biology; <sup>2</sup>Volen Center for Complex Systems; <sup>3</sup>Sloan-Swartz Center for  
7 Theoretical Neurobiology Brandeis University, Waltham, MA, USA; <sup>4</sup>Center for  
8 Theoretical Neuroscience, Columbia University, New York, NY, USA; <sup>5</sup>Dept. of  
9 Neuroscience, Swartz Program in Theoretical Neuroscience, Kavli Institute for Brain  
10 Science, College of Physicians and Surgeons and Mortimer B. Zuckerman Mind Brain  
11 Behavior Institute at Columbia University, New York, NY, USA

12 **Number of Pages:** 18

13 **Number of Figures and Tables:** 8 Figures, 0 Tables

14 **Number of words:** Abstract: 250 words, Intro: 659, Discussion: 1488

15 **Conflicts of interest:** The authors declare no competing interests.

16 **Acknowledgements:** This work was funded by NIH EY029999 (KDM + SDV), NSF 1707398 (KDM  
17 + AP), Gatsby Charitable Foundation GAT3708 (KDM + AP), and Swartz Foundation (AP). We thank  
18 members of Miller lab and Van Hooser lab for comments on the work. We thank David Fitzpatrick's  
19 lab for providing AAV9-mDlx-ChR2-mCherry-Fishell-3.

20 **Contributions:** KDM and SDV designed experiments; SW designed ProjectorScope 2.0 and carried  
21 out experiments, modeling, and analysis; AP provided models and interpretations. SW and SDV  
22 wrote the paper with input from AP and KDM.

23 **Keywords:** inhibition-stabilized networks, thalamocortical, recurrent connections, striate cortex,  
24 area 17

25 **Corresponding Author:**

26 Stephen D. Van Hooser,

27 Brandeis University

28 415 South St. MS008, Waltham

29 MA 02453 USA

30 **e-mail:** [vanhoosr@brandeis.edu](mailto:vanhoosr@brandeis.edu)

31

---

## 32 Abstract

33 Cross-orientation suppression is a classic form of contextual normalization in visual cortex, yet  
34 the degree to which cortical circuits participate in the normalization computation is unclear. We  
35 visualized orientation maps of individual ferrets, and provided patterned optogenetic stimulation  
36 to both excitatory and inhibitory cells in orientation columns that either matched or were  
37 orthogonal to the preferred visual orientation of neurons recorded with electrodes. When visual  
38 or optogenetic stimulation of columns preferring one orientation was combined with optogenetic  
39 stimulation of columns preferring the orthogonal orientation, we observed less suppression than  
40 when orthogonal stimulation was provided visually, suggesting that cortical circuits do not  
41 provide a large fraction of visual cross-orientation suppression. Integration of visual and  
42 optogenetic signals was linear when neurons exhibited low firing rates and became sublinear  
43 when neurons exhibited higher firing rates. We probed the nature of sublinearities in cortex by  
44 examining the influence of optogenetic stimulation of cortical interneurons. We observed a range  
45 of responses, including evidence for paradoxical responses in which interneuron stimulation  
46 caused a decrease in inhibitory firing rate, presumably due to the withdrawal of recurrent  
47 excitation. These results are compatible with cortical circuits that exhibit strong recurrent  
48 excitation with stabilizing inhibition that provides normalization, albeit normalization that is too  
49 weak across columns to account for cross-orientation suppression.

50

---

## 51 Introduction

52 Responses of neural circuits depend on context. In visual cortex, neurons respond to bars or grat-  
53 ings of a preferred orientation but are also highly influenced by the simultaneous presentation of  
54 additional stimuli, such as gratings that are orthogonal to the preferred orientation or flanking stim-  
55 uli (Bishop et al., 1973; Morrone et al., 1982; Bonds, 1989; DeAngelis et al., 1992; Das and Gilbert,  
56 1999; Cavanaugh et al., 2002; Smith et al., 2006; Busse et al., 2009; MacEvoy et al., 2009). Many of  
57 these contextual influences are well-described phenomenologically by a normalization equation  
58 that consists of summation and division (Bonds, 1989; Carandini and Heeger, 2011). However, the  
59 cortical circuit mechanisms that underlie contextual processing are incompletely understood.  
60 A classic form of normalization is cross-orientation suppression: the response of visual cortical  
61 neurons to a preferred orientation is suppressed when an orthogonal stimulus is also presented,  
62 even if the neuron exhibits no response to the orthogonal stimulus when presented alone. Under-  
63 standably, cross-orientation inhibition emerged as an early hypothesis for the circuit implementa-  
64 tion of cross-orientation suppression (DeAngelis et al., 1992; Heeger, 1992), but experiments that  
65 blocked cortical inhibition or measured the orientation dependence of cortical inhibition did not  
66 find evidence consistent with this hypothesis (Anderson et al., 2000; Katzner et al., 2011). Subse-  
67 quently, careful consideration of the responses of the feed-forward inputs from the lateral genic-  
68 ulate nucleus (LGN) led to a feed-forward hypothesis: that desynchronization of the temporal re-  
69 sponse phases of the LGN inputs to a given V1 cell, LGN saturation and rectification, and V1 spike  
70 threshold could account, in large part, for the reduced responses observed in cross-orientation  
71 suppression (Freeman et al., 2002; Li et al., 2006; Priebe and Ferster, 2006; Priebe, 2016). How-  
72 ever, experiments using dichoptic presentation of the two gratings showed a weak cortical com-  
73 ponent of cross-orientation suppression (Sengpiel and Vorobyov, 2005), and it remains unclear  
74 whether the arguments supporting the feed-forward hypothesis, which were based on analysis of  
75 responses to drifting gratings, would apply to the thin bar stimuli used by MacEvoy et al. (2009).  
76 In addition, normalization is observed in a variety of visual cortical computations in both V1 and  
77 MT (Heuer and Britten, 2002), and experiments and circuit models suggest that recurrent cortical

78 connections, particularly those that operate in an inhibition-stabilized regime (Ozeki et al., 2009;  
79 Shushruth et al., 2012; Rubin et al., 2015; Litwin-Kumar et al., 2016; Sato et al., 2016; Palmigiano et  
80 al., 2020), have the necessary ingredients to implement normalization that does not involve direct  
81 cross-orientation inhibition.

82 We designed experiments to directly probe the possible role of cortical circuits in cross-orientation  
83 normalization. Using a custom ProjectorScope apparatus (Huang et al., 2014; Roy et al., 2016), we  
84 located orientation maps in ferret visual cortex with intrinsic signal imaging, and then provided  
85 patterned optogenetic stimulation directly to different orientation columns. We examined, with  
86 electrode recordings, how cortical circuits integrate visual and optogenetic stimuli of different con-  
87 trasts and orientations.

88 We observed substantial differences in the interaction of columns depending upon whether stim-  
89 ulation was delivered visually or optogenetically. First, optogenetic activation of an orientation  
90 column caused spiking activity that spread beyond the orientation columns that were directly stim-  
91 ulated (but not when glutamatergic synapses were blocked). Second, paired responses to visual  
92 stimulation at the preferred orientation and optogenetic stimulation of the orthogonal columns  
93 were smaller than the linear sum of the two stimuli alone, but the paired suppression was sub-  
94 stantially less than was observed with purely visual paired stimuli. Further, paired optogenetic  
95 stimulation of iso-orientation and orthogonal columns showed far less suppression than visual-  
96 opto stimulus pairs. Finally, all 3 combinations of stimuli exhibited different suppression dynamics  
97 for marginal increases in the orthogonal stimulus, suggesting that different circuit behaviors un-  
98 derlie these different situations.

99 In a second set of experiments, we looked for hallmarks of inhibition-stabilized activity, where  
100 providing additional drive to inhibitory neurons causes a “paradoxical” decrease in inhibitory re-  
101 sponses instead of the expected increase due to the increased drive (Tsodyks et al., 1997; Ozeki et  
102 al., 2009; Sanzeni et al., 2020). In models, the paradoxical decrease is due to a temporary increase  
103 in inhibition, which removes excitatory drive from the circuit, which in turn results in weaker acti-  
104 vation of inhibitory neurons. Using an inhibitory cell specific promoter (Dimidschstein et al., 2016),  
105 we provided optogenetic activation to cortical inhibitory neurons during visual stimulation. We ob-  
106 served a range of inhibitory neuron responses, including some that were “paradoxical” and others  
107 that were not.

## 108 **Results**

### 109 **Direct stimulation to test normalization mechanisms in cortex**

110 Visual cortical neurons exhibit sublinear responses to the simultaneous presentation of two grating  
111 stimuli (Adelson and Movshon, 1982; Morrone et al., 1982; Morrone et al., 1987; DeAngelis et al.,  
112 1992; Heeger, 1992; Carandini et al., 1997; Simoncelli and Heeger, 1998; Reynolds and Heeger,  
113 2009; Popovic et al., 2018). Because some of this suppression is likely present in the inputs to the  
114 cortex that arise from LGN (Freeman et al., 2002; Li et al., 2006; Priebe and Ferster, 2006), we  
115 designed an experiment to directly provide input to different regions of the cortical circuit itself, in  
116 order to separate cortical contributions to normalization from those of its inputs.

117 To do this, we updated a custom-made optical system (Roy et al., 2016), now called ProjectorScope  
118 2 (Fig. 1A), that allowed us to use intrinsic signal imaging (Blasdel and Salama, 1986; Grinvald  
119 et al., 1986) to identify the locations of orientation columns and also allowed us to provide pat-  
120 terned optogenetic stimulation to the cortical surface. We injected viruses to express a variant of  
121 ChR2 (Boyden et al., 2005; Berndt et al., 2011) nonspecifically in all neurons (Roy et al., 2016) and  
122 prepared the ferrets for intrinsic signal imaging. After the orientation column map was acquired,  
123 optogenetic stimulation masks that targeted certain orientation columns were calculated based  
124 on the empirical map, and masked images were subsequently projected onto the V1 surface to  
125 stimulate the corresponding columns (Fig. 1B and 1C).

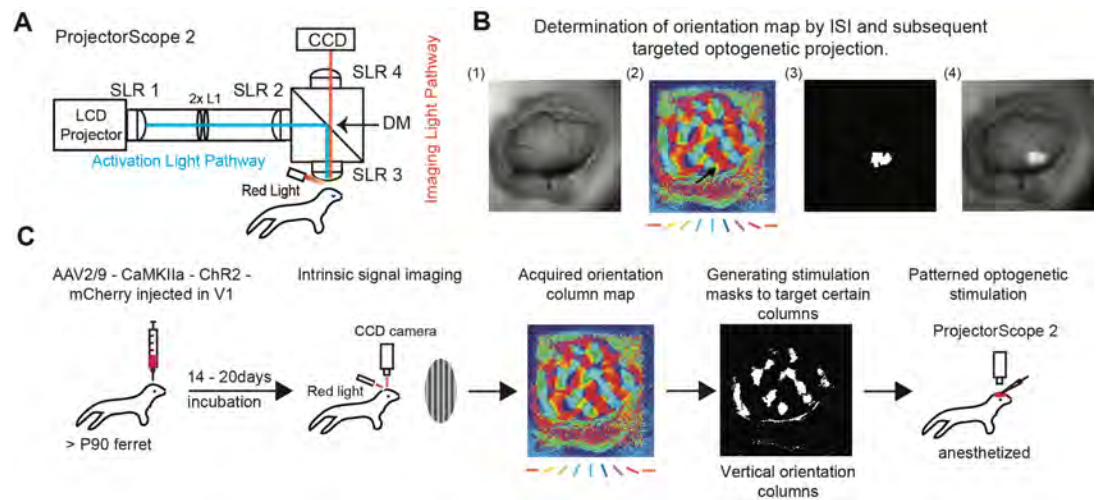

**Figure 1. Optogenetic simulation of functionally-identified cortical columns with ProjectorScope 2.** **A:** ProjectorScope 2 construction. Patterned light for optogenetic stimulation is generated by an LCD projector and transmitted to the brain surface by three SLR lenses of the same type. Two juxtaposed lenses (2x L1) are used to minify the projection image to the appropriate size, 3mm by 3mm, in order to target several orientation columns in ferret V1. A dichroic mirror (DM) reflects light between 390-460 nm to activate Chr2, while allowing green and red light to pass to the CCD camera for intrinsic signal imaging (ISI). ISI is performed by providing brightfield red light over the brain surface and taking images of the reflected light using the CCD, with an SLR lens to bring the light into focus. **B:** Determination of orientation map by ISI and subsequent targeted optogenetic projection. (1) Brain surface lit by room light. (2) The orientation column map acquired by ISI. The color key indicates the angle that a local region prefers. The arrow points to a region that will be used for targeted projection. (3) A projection mask based on the region pointed by the arrow in (2). (4) A raw image of the projection of the mask onto the brain surface. **C:** Viruses are injected to express Chr2 in V1 of adult ferrets, over 90 days old. After about three weeks, ISI is performed on the transfected ferrets to acquire an orientation column map. Then, the masks that target columns with certain orientation angles are generated based on the map.

126 **Single-column optogenetic stimulation causes wide spread of activity due to hori-**  
 127 **zontal connections**

128 A key requirement of our experiment was to demonstrate that we could provide distinct input to  
 129 different groups of nearby cortical neurons. While it was clear from visual inspection of the camera  
 130 image that the light stimulus was illuminating distinct portions of the cortical circuit, several out-  
 131 comes were possible at the neural level. First, providing direct input to a small column of neurons  
 132 might only activate the neurons that were stimulated. Second, our direct optogenetic input might  
 133 be restricted to distinct groups of neurons, but that activity could spread across columns through  
 134 cortical synaptic connections; in this case, we would need to perform additional experiments with  
 135 synaptic blockers to show that optogenetic inputs were being provided to distinct groups of neu-  
 136 rons. Third, because axonal projections extend for millimeters and dendritic trees extend for a few  
 137 hundred microns across the cortical surface, activation of these axons and dendrites might be suf-  
 138 ficient to drive spiking in cell bodies over a wide area, which would mean that we would be unable  
 139 to provide inputs to distinct groups of nearby neurons even with precise optical stimulation of the  
 140 cortical surface.

141 Using electrodes, we characterized the optogenetic receptive zone (ORZ) of single neurons by stim-  
 142 ulating the brain surface using circular dots ( $\approx 750\mu\text{m}$  in diameter) in a randomized fashion. A 2-D  
 143 Gaussian fit was performed on the recorded optogenetic responses over the cortical surface to de-  
 144 lineate the local region that could be effectively activated by light (Fig. 2A). The ORZ could therefore  
 145 be described as an elliptical shape comprising the interior 63%-tile of the fit (Roy et al., 2016).  
 146 We found that ORZs were larger in these adult ferrets (about the size of a ferret hypercolumn) than  
 147 in our previous work in young ferrets (Roy et al., 2016), so we created stimuli to test the specificity of

148 activation of different orientation columns that were restricted to the ORZ (Fig. 2B). In this manner,  
 149 we examined the “tuning” of each neuron to optogenetic activation of various orientation columns  
 150 within the ORZ. We found that responses were quite non-specific, indicating that cortical activity  
 151 spread substantially across orientation columns (Fig. 2C, left). There are two possible sources for  
 152 this spread: either our optical stimulus itself caused widespread activation, or direct optogenetic  
 153 activation was restricted to specific regions of the cortical surface and the spread of activity was  
 154 due to activity within the cortical network.  
 155 To differentiate the two scenarios, we applied synaptic blockers (NBQX and DL-AP5 to block AMPA  
 156 and NMDA receptors, respectively) and measured the specificity index (1- circular variance) before  
 157 and after the application of synaptic blockers. We found that neurons exhibited more specific  
 158 responses to the preferred-column activation in the presence of synaptic blockers (Fig. 2D, t-test,  
 159  $P = 0.0387$ ). This suggests that some of the non-specific column-based optogenetic stimulation is  
 160 due to the spread of evoked neural activity via connections intrinsic to the visual cortex, consistent  
 161 with previous studies in tree shrew (Huang et al., 2014). Nevertheless, the fact that responses  
 162 evoked with optogenetic stimulation in the presence of synaptic blockers were more local showed  
 163 that we were able to provide input to distinct regions.

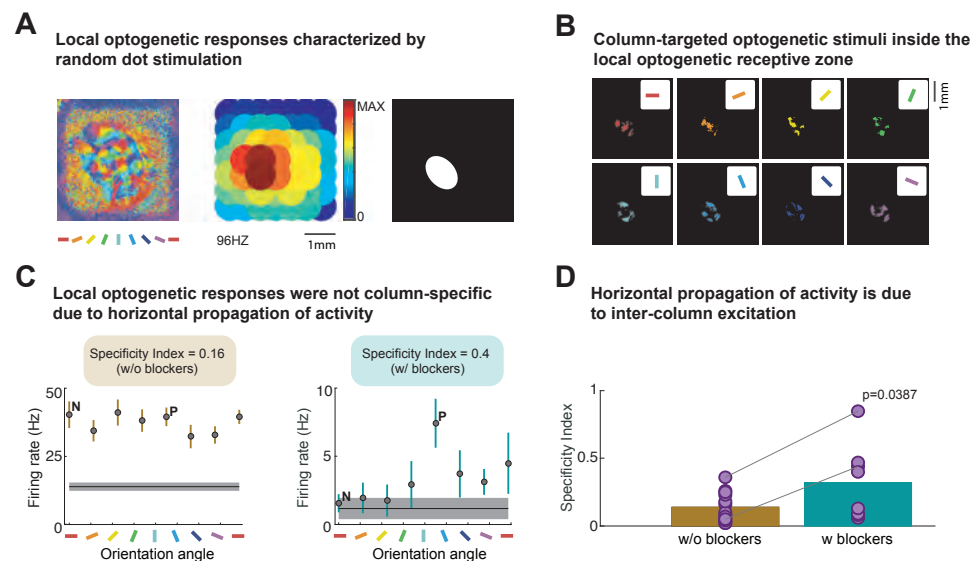

**Figure 2. Although optogenetic activation of cortex produced local activity, this activity did not respect boundaries of orientation columns, due to horizontal propagation of activity.** **A:** The orientation column map (left); the optogenetic responses of a single unit to spot stimuli (750  $\mu\text{m}$  in diameter) with the heat map indicating the response intensities (middle); the elliptical optogenetic receptive zone (ORZ) characterized by two-dimensional Gaussian fit of the responses to spot stimulation (right). **B:** The masks used to test the orientation column specificity of the optogenetic stimulation were generated inside the optogenetic receptive zone and targeted orientation columns of varying angles with steps in 22.5 degrees. **C:** A neuron’s optogenetic responses of the orientation specificity test before synaptic blockers and after synaptic blockers. The orientation angles shown on the x-axis are the angles of the corresponding column masks. **D:** The average specificity index of all the neurons ( $n=12$  without blockers;  $n=8$  with blockers) after synaptic blockers are applied is higher than that when no blockers are used ( $P<0.05$ ). Blue lines connect data points acquired from the same neurons. These results imply that ChR2 stimulation of the cortex in animals of this age activates several adjacent orientation columns, in part due to synaptic propagation of signals across the cortex.

164 **Visual, mixed visual and optogenetic stimulation, and paired optogenetic stimula-**  
 165 **tion have different normalization properties**

166 Having established that we could provide distinct independent inputs to different groups of cor-  
 167 tical neurons, we examined the cortical contributions to normalization by comparing how the re-

168 sponse to the simultaneous presentation of a pair of stimuli was related to a simple linear sum of  
 169 the responses to the stimuli independently. In all, we compared cortical integration under three  
 170 conditions: visual, combined visual and optogenetic, and all optogenetic (Fig. 3).

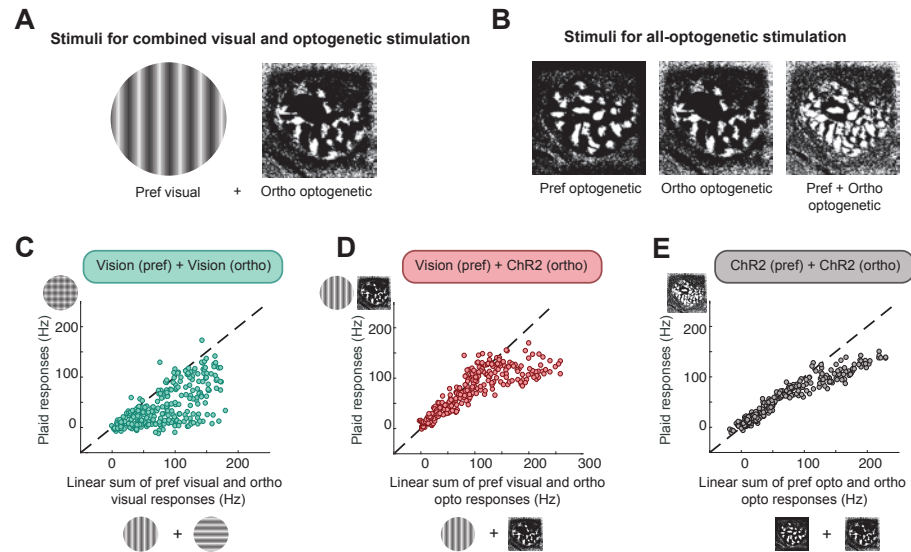

**Figure 3. Neurons exhibit sublinear responses to combined visual and optogenetic stimulation.** **A:** The stimuli used for hybrid stimulation. The visual stimulus provides the preferred orientation of the recorded neuron and the projection mask provides optogenetic modulation. **B:** Optogenetic stimuli for activation of neuron recorded with an electrode. Left) A strong optogenetic stimulus that includes the electrode region and all columns that prefer the same orientation (within 30°) as the recording site. Middle) A modulating stimulus that excludes the 1-sigma optogenetic receptive zone but includes all columns that prefer the orthogonal orientation (within 30°) as the recording site. Right) Combined stimuli. **C:** Single-unit responses to paired visual stimulation of preferred and orthogonal orientations, compared to the linear sum of preferred and orthogonal responses when those stimuli were presented alone. For each cell (N=23 cells, from 5 animals), responses to 16 combinations of preferred and orthogonal orientations are shown (4 contrast levels each). Responses are clearly sublinear for stimuli that evoked low or high firing rates. **D:** Single unit responses to paired visual and optogenetic stimulation. For each cell, responses to 16 combinations of visual preferred orientation (4 contrast levels) and optogenetic stimulation of the orthogonal orientation columns (4 drive levels) are shown. For stimuli that evoked low firing rates, paired stimulation exhibited mostly linear summation, but this summation became more sublinear for stimuli that evoked higher firing rates. **E:** Single unit responses to optogenetic stimulation of a cell's preferred columns and orthogonal columns. For each cell, responses to 16 combinations of optogenetic drive (4 drive levels for preferred stimulation and orthogonal stimulation) are shown. For stimuli that evoked low firing rates, paired stimulation produced a response that was nearly the same as the linear sum of the two component stimuli when presented alone. For stimuli that evoked larger responses, summation became non-linear.

171 In the first condition (all visual), we examined the classic phenomenon of cross-orientation sup-  
 172 pression by comparing the sum of the responses of neurons to visual stimulation at the preferred  
 173 orientation or at the orthogonal orientation to the response to a visual "plaid" of the two orienta-  
 174 tions presented together, at a variety of stimulus contrasts. We compared these results to stim-  
 175 ulation with a visual stimulus at the preferred orientation combined with optogenetic activation  
 176 of the orthogonal orientation columns (Fig. 3A). Once again, we varied the relative drive of these  
 177 stimuli, by varying contrast in the case of the visual stimulus and by varying optogenetic light in-  
 178 tensity in the case of the optogenetic stimulus. Finally, we examined the responses to optogenetic  
 179 stimulation of columns that matched the preferred orientation of the recorded cell, optogenetic  
 180 stimulation of columns that were orthogonal to the preferred orientation of the recorded cell, and  
 181 responses to both stimuli paired, at a variety of optogenetic stimulus intensities (Fig. 3B).  
 182 There were obvious differences in the interactions among the different stimulation conditions. Re-  
 183 sponses of all recorded cells (N=23) to all contrast combinations are shown in Fig. 3CDE. Cross-

184 orientation visual stimulation showed substantial non-linear summation at all contrast levels and  
 185 response intensities (Fig. 3C), while visual-optogenetic or optogenetic-optogenetic stimuli com-  
 186 bined linearly at low-to-moderate response levels and then exhibited sublinear summation at high  
 187 response levels (Fig. 3DE).

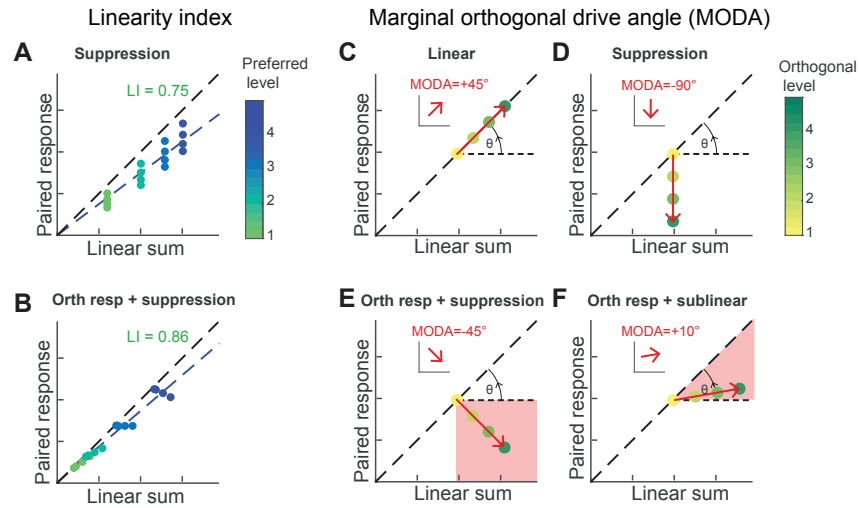

**Figure 4. Single unit response schematics.** **A:** Responses of a schematized neuron to paired stimulation of a preferred and orthogonal stimulus, as compared to the linear sum of responses to the individual stimuli alone. The schematized neuron was stimulated with the preferred stimulus at 4 levels of drive  $\alpha_1 - \alpha_4$ , and the orthogonal stimulus also covaried with 4 levels of drive  $\beta_1 - \beta_4$ . Color indicates the preferred stimulus contrast. We calculated a Linearity Index (LI) as the slope of a linear fit that went through the origin and fit the other points with least squared error. **B:** A second schematized neuron. **C-F:** A neuron being driven with a high-drive ( $\alpha_4$ ) preferred stimulus paired with an orthogonal stimulus at increasing drive ( $\beta_1 - \beta_4$ ). **C:** In this neuron, the response to paired stimulation is equal to the linear sum of the stimuli presented alone; that is, for marginal increases in orthogonal drive (increases in  $\beta$ ), the response moves at an angle of  $+45^\circ$  in this space. We call this the Marginal Orthogonal Drive Angle (MODA). **D:** An example of pure suppression. Marginal increases in orthogonal stimulus drive causes a reduction in the paired response, but the orthogonal stimulus does not provide any drive by itself (linear sum of the two stimuli alone is unchanged). MODA is  $-90^\circ$ . **E:** A cell where the orthogonal stimulus produces a response alone – the responses move rightward along the X axis with increasing orthogonal drive – but the net impact on paired stimulation is to provide suppression – the response moves downward along the Y axis with increasing orthogonal drive. MODA is between  $-90^\circ$  and  $0^\circ$ . **F:** A cell where the orthogonal response produces a response alone and the net impact on paired stimulation is sublinear addition – the response moves rightward and upward with increasing orthogonal drive. MODA is between  $0^\circ$  and  $+45^\circ$ .

188 To probe these differences further, we developed two quantitative measures. The first measure,  
 189 that we termed the Linearity Index (LI), is a measure of the overall linearity of the response and is  
 190 the slope of the line that i) must pass through the origin at 0,0, and ii) passes through all responses  
 191 to all combinations of paired stimuli with least squared error (Fig. 4AB). For the second measure, we  
 192 calculated the directional angle of movement of the joint response vs. the linear sum of responses  
 193 when the preferred contrast was high as the orthogonal contrast was increased (see Materials  
 194 and Methods). We called this second measure the Marginal Orthogonal Drive Angle (MODA). A  
 195 MODA value of  $+45^\circ$  indicates linear summation (Fig. 4C), while a MODA value of  $-90^\circ$  indicates  
 196 that the second stimulus does not exhibit a response on its own but provides suppression of the  
 197 response to the first stimulus (Fig. 4D). MODA values that are between  $-90^\circ$  and  $0^\circ$  indicate that  
 198 the second stimulus does exhibit some response on its own, but that its influence on the paired  
 199 stimulation is overall suppressing (Fig. 4E). Finally, MODA values between  $0^\circ$  and  $+45^\circ$  indicate that  
 200 the second stimulus exhibits some response on its own, and contributes positively but sublinearly  
 201 to the response to the paired stimuli (Fig. 4F).  
 202 Analysis of single cell responses indicated that normalization was substantially different across

203 these different stimulus conditions. In the all-visual condition, responses were highly sublinear  
204 across all response intensities, and orthogonal stimuli tended to be primarily suppressive (MODA  
205 near  $-90^\circ$ ), as shown in the example cells in Fig. 5A. In the mixed vision-optogenetics condition,  
206 responses were relatively linear for low stimulus response values. Many cells, such as those ex-  
207 amples in Fig. 5B, exhibited MODA values between  $-90^\circ$  and  $0^\circ$ , indicating that the orthogonal  
208 optogenetic stimulus provided some response on its own, but that this orthogonal stimulus most  
209 commonly provided suppression to the paired stimulation. In all-optogenetic stimulation (Fig. 5C),  
210 MODA values were commonly just slightly positive, indicating that orthogonal stimulation provided  
211 a response when presented alone, and that the paired response was increased by orthogonal stim-  
212 ulation, albeit in a sublinear manner.

213 Population data across all cells is shown in Fig. 5DEF. In the all-visual condition, the Linearity Index  
214 (LI) was statistically constant (Fig. 5Di), being the same for cells that exhibited low firing rates or  
215 high firing rates when the preferred stimulus was shown at high contrast ( $P=0.6149$ ). The MODA  
216 values in the all-visual condition were clustered around  $-90^\circ$  (Fig. 5Dii), indicating that the orthogo-  
217 nal visual stimulus did not drive cells by itself, but suppressed responses to preferred visual stimuli.  
218 This was true particularly for cells with long Marginal Orthogonal Drive vector lengths that reflect  
219 the presence of a strong trend. In the mixed visual and optogenetics measurements, the linearity  
220 index was nearly 1 for cells that exhibited lower firing rates to high contrast visual stimulation, but  
221 was less than 1 for cells that exhibited higher firing rates to high contrast visual stimulation (Fig.  
222 5Ei). MODA values for this condition were variable, with most cells ranging between  $-90^\circ$  and  $0^\circ$   
223 (Fig. 5Eii), indicating that the orthogonal optogenetic stimulus drove cells by itself, but suppressed  
224 responses to preferred visual stimuli. Finally, for the all-optogenetic condition, linearity indexes  
225 were again dependent upon the maximum firing rate of the cell to the preferred stimulus, with  
226 cells that exhibited high firing rates exhibiting more sublinear responses (Fig. 5Fi. MODA values  
227 were clustered around a slightly positive angle (Fig. 5Fii), indicating that the orthogonal optogenetic  
228 stimulus drove cells by itself, and added sublinearly to the response to preferred optogenetic stim-  
229 ulation. The different MODA values across the three stimulus pairing types indicated that these results  
230 cannot be explained by a simple single-cell saturation mechanism, but rather suggest that cortex  
231 is integrating these signals differently.



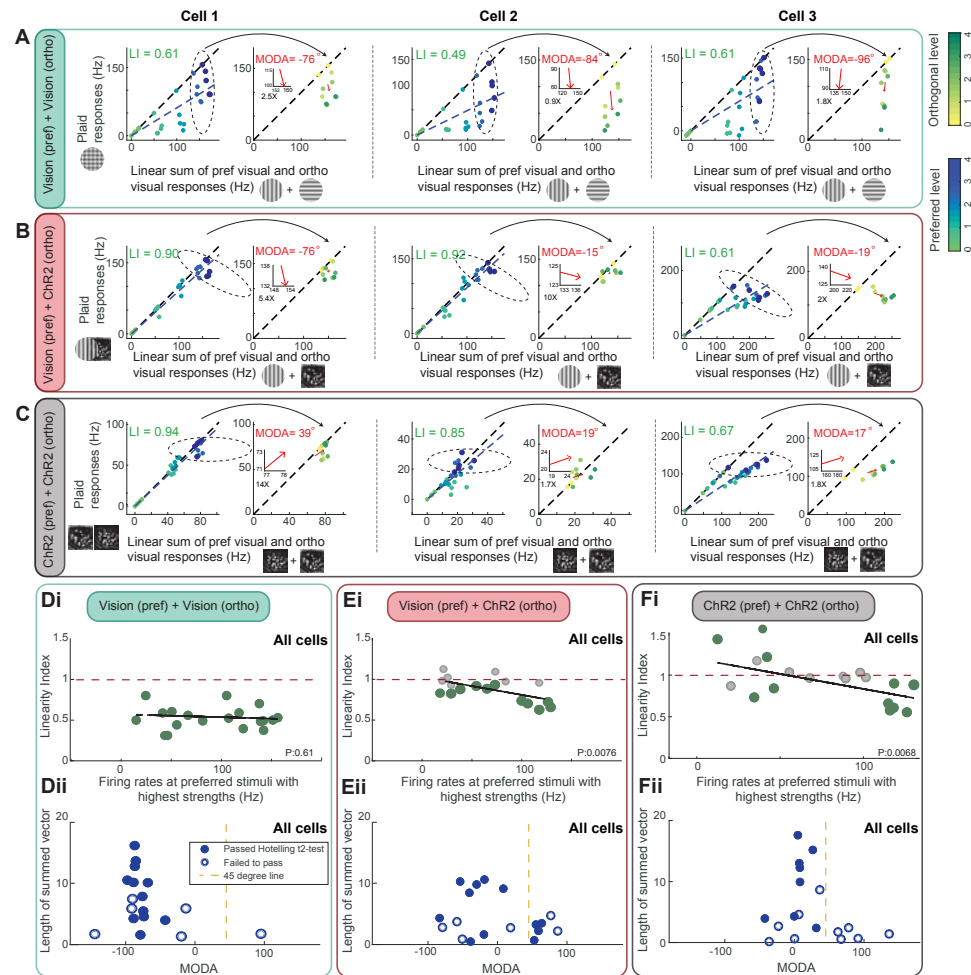

**Figure 5. Responses of individual neurons and populations.** **A:** Responses to paired visual stimulation of preferred and orthogonal gratings compared to the linear sum of those stimuli delivered alone. **A, left graph:** Cells were shown preferred gratings at 4 different contrast levels (levels, see color key) and orthogonal gratings at 4 different contrast levels (not differentiated). Linearity index (LI) fit line shown with LI value. **A, right graph:** Changes in responses with marginal increases in orthogonal drive. Responses to increasing orthogonal drive are shown paired with the two highest preferred contrasts. Marginal orthogonal drive vector and marginal orthogonal drive angle (MODA) indicated. A zoomed-in view of the MODA vector is provided in the inset, with magnification (NX) indicated. Note how for cell 2 and 3, the MODA is close to 90°, indicating almost pure suppression. **B:** Same, but for combinations of visual and optogenetic stimulation. Cells were driven with visual gratings at the preferred orientation with 4 levels of contrast, and orthogonal orientation columns were driven optogenetically at 4 levels of drive. Cells in B are the same cells in A. MODA values were variable among this population. **C:** Same, but for all optogenetic stimulation. Cells were driven with optogenetic stimulation of the preferred columns at 4 levels of drive, and were driven with optogenetic stimulation of the orthogonal columns at 4 levels of drive. MODA values tended to be above 0°, indicating that orthogonal stimuli provided drive and added sublinearly with the preferred stimulus. **Di, Ei, Fi:** Linearity index values for all cells, plotted against the firing rate that was produced for preferred stimuli at the highest contrast or drive. **Di:** For purely visual stimulation, Linearity Index values were approximately 0.5 and did not exhibit any significant correlation with maximum firing rate (Pearson's correlation,  $p=0.615$ ). Filled dot indicates values that differed significantly from 1 (t-test,  $p<0.05$ ). Open dot in subsequent panels indicates values that did not differ significantly from 1 (t-test,  $p<0.05$ ). **Ei:** For mixed visual and optogenetic stimulation, Linearity Index values were approximately 1 when cells exhibited low firing rates, and decreased when cells exhibited higher firing rates. There was a significant correlation between the Linearity Index and maximum firing rate for visual stimulation at the preferred orientation (Pearson's correlation,  $p<0.0076$ ). **Fi:** Linearity index values when stimulation to preferred and orthogonal columns was provided by optogenetic stimulation. There was a significant correlation between the Linearity Index and maximum firing rate ( $p<0.0068$ ). **Dii, Eii, Fii:** Marginal orthogonal drive vector lengths and angles.

232 **Fig. 5 Caption continuation** Cells that exhibited a vector that differed significantly from 0,0 (Hotelling-T2 test  $p < 0.05$ ) are indicated by filled dots;  
233 vectors that did not differ significantly from 0,0 are plotted as open dots. **Dii:** Length and MODA values for visual stimulation. There were a cluster of  
234 points with significant vector lengths with MODA values near  $-90^\circ$ , indicating that cross-orientation stimulation is primarily suppressing. **Fii:** Values  
235 for mixed visual stimulation (preferred orientation) and optogenetic stimulation (orthogonal columns). There was a range of MODA values but the  
236 median cell exhibited a MODA value that was between  $-90^\circ$  and  $0^\circ$ . **Gii:** Values for optogenetic stimulation (preferred columns and orthogonal  
237 columns). MODA values for vectors that had significant length were slightly positive. These results indicate that all three stimulus paradigms  
238 exhibited different marginal influences of increasing orthogonal drive.

### 239 **Circuit models that might underlie these responses**

240 At first inspection, the differences in normalization for these different conditions are difficult to rec-  
241 oncile with what is known from previous work on cortical circuits. If we imagine a region H that is  
242 selective to horizontal orientations, and a nearby region V that is selective to vertical orientations,  
243 then during visual stimulation with horizontal orientations, region H exhibits strong responses,  
244 while region V does not respond. Further, synaptic conductance measurements of visually respon-  
245 sive neurons in region V indicate that principal neurons in V do not receive strong inhibitory or  
246 excitatory inputs when horizontal orientations are presented (Anderson et al., 2001), so the visu-  
247 ally responsive neurons in H cannot strongly inhibit or excite the principal neurons of V. On the  
248 other hand, if we optogenetically activate region H, then we observe responses in V.  
249 How can optogenetic activation of region H cause activity in region V when visual activation of H  
250 does not? If we set aside the possibility that the direct optogenetic stimulation is not actually local  
251 (see Fig. 2), then one of the simplest ways this can happen is if there are projections across the  
252 columns by neurons that are not driven by the visual stimulus used to drive area H. These neurons  
253 might not be visually responsive at all, or might have spatial or temporal frequency preferences  
254 that were not driven by the visual stimuli used here. A 2-photon imaging study of anesthetized  
255 ferrets of a similar age showed that visual responses are relatively sparse, and that many neurons  
256 did not exhibit responses to visual stimulation (Smith et al., 2015). These neurons are likely to  
257 be activated by optogenetic stimulation, and they may exhibit coupling into the circuit that differs  
258 from their nearby visually-active neighbors.  
259 There is a wide – but not an unlimited – number of possible circuits that could meet these criteria.  
260 Here, we show two examples of circuit models that are inconsistent with our observations on the  
261 way to unpacking one example circuit configuration that is consistent with our observations.  
262 We began with the ring model of Rubin et al. (2015) (Fig. 6A). Each position in the ring represents  
263 a preferred orientation, ranging around the ring from  $0^\circ$  ( $= 180^\circ$ ) to  $179^\circ$ , and is modeled by a pair  
264 of E and I cells that are reciprocally- and self-connected. Each pair forms a supralinear stabilized  
265 network. The synaptic strengths of the horizontal connections across elements of the ring fall off  
266 slowly with distance/orientation in a gaussian manner, and all connection strengths (E-to-E, E-to-I,  
267 I-to-E, I-to-I) fall off with the same distance dependence ( $\sigma = 32^\circ$ , as one moves along the ring). The  
268 visual input is tuned to stimulus orientation and falls off in a Gaussian manner ( $\sigma = 30^\circ$ ) as one  
269 moves away from the cells that prefer a given orientation, and optogenetic input falls off similarly  
270 but is set slightly broader ( $\sigma = 45^\circ$ ). The visual and optogenetic input are provided to both E and I  
271 cells. Neurons with different maximum firing rates are simulated by varying the maximum input  
272 level provided to different simulations.

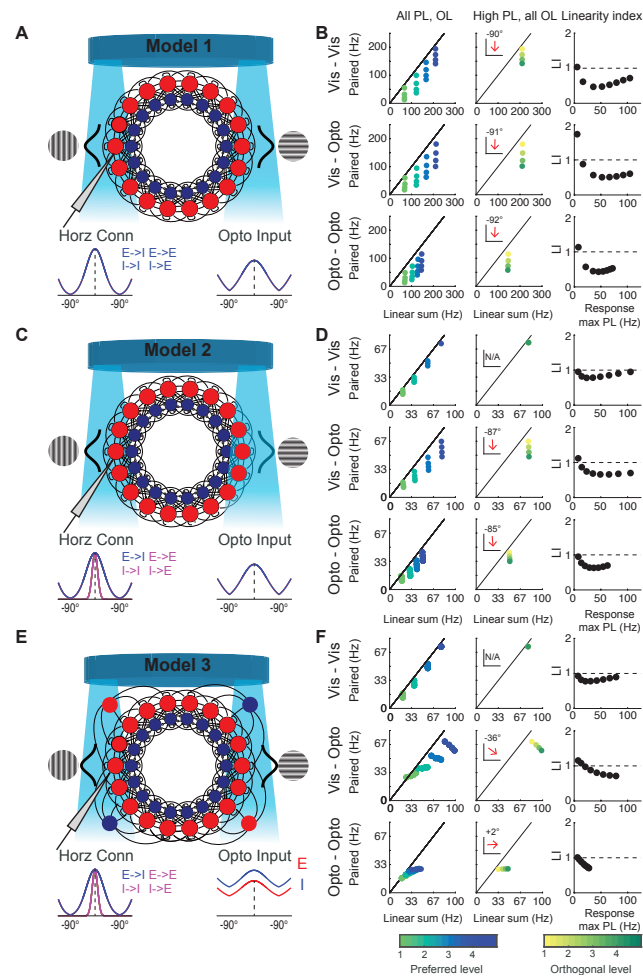

**Figure 6. Models consistent with data.** Common to all models: Cells are arranged in a ring, with an excitatory (E) and inhibitory (I) unit at each position. Position corresponds to preferred orientation. The units are coupled in a supralinear stabilized network. Visual and optogenetic inputs are centered at the stimulus orientation, are equal to E and I units at a given position, and decrease as a Gaussian function of the difference between the stimulus orientation and the units' preferred orientation. For visual input, the Gaussian has standard deviation 30°; for optogenetic input, the standard deviation is 45°. **A:** Model 1: The ring model of Rubin et al. (2015). Horizontal connectivity among all cortical cells decreases as a Gaussian of standard deviation 32°. **B:** Left) Responses of Model 1 to stimulation with 16 combinations of 4 preferred levels of drive (PL) and 4 orthogonal levels (OL) of drive. Cells were shown preferred gratings at 4 different contrast levels (levels, see color key) and orthogonal gratings at 4 different contrast levels (not differentiated) Top) preferred and orthogonal are visual; Middle) preferred is visual and orthogonal is optogenetic; Bottom) preferred and orthogonal are optogenetic Center) Responses for the strongest preferred stimulus and varying orthogonal drive (see color key). MODA value indicated in inset. Right) Linearity index for cells with different maximum firing rates. Model 1 exhibits stronger normalization than is observed in cortex, and marginal orthogonal drive increases cause only suppression, in contrast to data from cortex for visual-optogenetic and optogenetic-optogenetic conditions. **C:** Model 2: Modified ring model with less cortical normalization. Now, E to I connections fall off as a Gaussian of 25° width; other connections fall off with 10° width. **D:** Same as B, for Model 2. Visual normalization is no longer provided by the cortex. For optogenetic stimulation, this model exhibits weaker normalization, but orthogonal stimuli are still almost purely suppressing, in contrast to data from experiments. **E:** Model 3: Now optogenetic stimulation also activates non-visual E and I neurons (disembodied cells) that are coupled to the entire network, so that the effective optogenetic input is broad. **F:** Same as B, for Model 3. Now, mixed visual and optogenetic input is more linear at low response rates, and MODA shows that the orthogonal stimulus provides some response by itself but suppresses responses to the preferred visual stimulus, as in experiment. Pure optogenetic stimulation is more linear at low response rates, and MODA shows that the orthogonal stimulus provides some response by itself and adds sublinearly to the response to the preferred visual stimulus, as in experiment.

273 Responses to combinations of visual and optogenetic inputs at different contrasts in the unmod-  
274 ified Rubin et al. (2015) (Model 1) are shown in Fig. 6B. Previous studies (Ahmadian et al., 2013;  
275 Rubin et al., 2015) have shown that cross-orientation normalization in this model occurs alongside  
276 the paradoxical response of an inhibition-stabilized circuit: cross-orientation inputs to inhibitory  
277 neurons causes the firing rates of both E and I neurons to drop, so that overall cross-orientation  
278 suppression results in a net reduction of both excitatory and inhibitory synaptic conductances. In  
279 this model, linearity indices are near 1 for cells that were only driven weakly by the preferred stim-  
280 ulus, and drop to about 0.5 for cells that are driven more strongly by the preferred stimulus. This  
281 differs from the actual data from our experiment, where the linearity index was nearly constant  
282 (around 0.5) for cells that were driven either strongly or weakly (Fig. 5D). Further, MODA values  
283 in the model for all conditions (all-visual, mixed visual and optogenetic, and all-optogenetic) were  
284 all around  $-90^\circ$ , indicating that the orthogonal stimulus was producing strong suppression without  
285 causing a response on its own. These simulation results are inconsistent with our measurements  
286 in the mixed and all-optogenetic conditions (where the orthogonal stimulus caused a response and  
287  $\text{MODA} > -90$ ), indicating that the unmodified Rubin et al. model exhibits stronger cross-orientation  
288 normalization than we observe in our measurements.

289 The fact that normalization in the original Rubin et al. model was too strong to account for the  
290 mixed visual and optogenetics results led us to explore a different cortical circuit model (Model 2).  
291 We dropped the requirement that the cortical circuit itself should provide visual cross-orientation  
292 suppression; instead, we allowed our model circuit to exhibit little visual cross-orientation suppres-  
293 sion, assuming that in the real circuit, much or all of this might occur in feed-forward inputs from  
294 the LGN (Freeman et al., 2002; Li et al., 2006; Priebe and Ferster, 2006; Priebe, 2016). We mod-  
295 ified the model so that E-to-E, I-to-E, and I-to-I connections were all much more local ( $10^\circ$  Gaus-  
296 sian fall-off instead of  $32^\circ$  fall-off), while leaving E-to-I connections at a  $25^\circ$  fall-off to allow some  
297 within-cortex normalization (Fig. 6C) but much weaker than would be required to account for cross-  
298 orientation suppression. Simulations showed that this model still lacked important features of our  
299 data: optogenetic cross-orientation stimulation did not, by itself, evoke strong responses in the  
300 model as it did in our data, but instead exhibited almost pure suppression (Fig. 6D). In this model,  
301 cross-column suppression when using an optogenetic stimulus is due to the broader tuning of the  
302 optogenetic input ( $\sigma = 45^\circ$ ).

303 Finally, we examined a circuit (Model 3) that had additional E and I neurons that were not visually  
304 active (Fig. 6E). Presumably these non-visual cells are active under specific conditions that might  
305 involve other modalities or modulatory states. We made very simple assumptions about these  
306 non-visual E and I neurons: they did not receive input from visually-responsive neurons, but they  
307 did provide broad, uniform projections to visually-responsive neurons around the ring. This model  
308 exhibited several features of our actual data (Fig. 6F). First, single optogenetic stimuli directed at  
309 preferred or orthogonal columns evoked responses across the whole ring. Second, mixing a pre-  
310 ferred visual stimulus with optogenetic stimulation of the orthogonal orientation columns evoked  
311 suppressive responses (MODA angles less than  $0^\circ$ ). Third, normalization was relatively linear for  
312 neurons that were driven to low firing rates (response ratio approximately 1 or even higher), and  
313 the degree of suppression increased for neurons that were driven to high firing rates (response  
314 ratio less than 1). Normalization was only prominent when cells were driven to higher firing rates,  
315 similar to the actual data. Fourth, paired optogenetic stimulation evoked sublinear responses but  
316 exhibited positive MODA angles (greater than  $0^\circ$ ), indicating that the paired response was greater  
317 than the response to the preferred stimulus alone.

### 318 **Selective optogenetic stimulation of inhibitory neurons reveals broad classes of** 319 **functional types.**

320 While Model 3 is consistent with our data, the space of possible cortical circuits that might exist in  
321 the brain and be consistent with our data is still very large. We sought to look for direct evidence  
322 of the inhibition-stabilized dynamics that the model posits, as has been found in the mouse (Sato

323 et al., 2016; Adesnik, 2017; Sanzeni et al., 2020) and for which evidence has been reported for  
324 surround suppression in cat (Ozeki et al., 2009) and ferret (Rubin et al., 2015). A key prediction  
325 of ISN-type dynamics is the presence of so-called “paradoxical responses” (Ozeki et al., 2009). If  
326 network activity is driven strongly by recurrent connections among excitatory and inhibitory cells,  
327 then local excitatory cells are responsible for a significant portion of the synaptic drive to inhibitory  
328 cells. If one were to selectively deliver an increase in drive to inhibitory neurons, then excitatory  
329 neurons would slow down, but this reduction in excitatory drive would in turn reduce the activity  
330 of cortical interneurons. Hence, in the model, the inhibitory cells “paradoxically” respond to small  
331 increases in activation with overall reductions in activity (as compared to the increase in activity  
332 that might be naively expected).

333 This prediction is illustrated by simulations in Fig. 7. Under a parameter regime where excitatory  
334 recurrent connections are set so strongly that the network activity would blow up without inhi-  
335 bition, and inhibitory synaptic strengths are set to be high enough to stabilize this activity (ISN  
336 regime), an external increase in drive to inhibitory neurons results in the described paradoxical  
337 decrease in activity in interneurons, until the external optogenetic drive to the inhibitory interneu-  
338 rons becomes so strong as to dominate the interneuron responses (Fig. 7ABC, same parameters  
339 as a single column of the rings of Rubin et al. 2015 and Model 3). On the other hand, if recurrent  
340 connections among excitatory and inhibitory neurons are weak (non-ISN), then external drive to  
341 inhibitory interneurons merely serves to monotonically increase the activity of these interneurons  
342 (Fig 7DEF).

343 To test these predictions, we prepared ferrets with a virus (AAV9-mDlx-ChR2-mCherry-Fishell-3)  
344 that restricts the expression of channelrhodopsin-2 to inhibitory neurons (Dimidschstein et al.,  
345 2016). We delivered wide-field white light to stimulate the brain surface, and the light intensity was  
346 modulated to achieve different levels of external drive to inhibitory neurons. Optogenetic stimula-  
347 tion was presented with and without visual stimulation at the preferred orientation with different  
348 contrasts, in order to understand how the activated cortex would be modulated by the external op-  
349 togenetic increases in inhibitory drive. In these experiments, a 32-channel probe (Plexon S-probe)  
350 was used to achieve better yield of recording both excitatory and inhibitory cells.

351 We observed a variety of response profiles to combined visual stimulation and optogenetic stimu-  
352 lation of interneurons. Some cells exhibited no response to optogenetic interneuron stimulation  
353 alone, but exhibited strong suppression of visual responses when optogenetic drive was strong.  
354 We labeled these neurons as putative excitatory neurons (Fig. 8A, bottom row).

355 We also observed response profiles that we imagined arose from inhibitory neurons. These cells,  
356 labeled as putative inhibitory neurons, exhibited strong responses to strong optogenetic stimula-  
357 tion when it was presented either with or without visual stimulation (Fig. 8A, top and middle rows).  
358 The putative inhibitory neurons always responded directly to light and, on average but not always,  
359 exhibited shorter spike duration than the putative excitatory cells (Supplementary Figure 8-1).

360 The putative inhibitory interneurons were not uniform in response profile, but instead exhibited  
361 a range of responses. At one extreme, responses from some putative inhibitory interneurons re-  
362 sembled the responses from interneurons in an ISN-like circuit (Fig. 8A, top row). During high con-  
363 trast visual stimulation, the activity of these interneurons was suppressed for weak optogenetic  
364 activation, consistent with the idea that increased drive to interneurons was reducing excitatory  
365 activity, which in turn decreased recurrent inhibitory activity. Without simultaneous visual stimu-  
366 lation, these were less clear, given the low spontaneous firing rates of most neurons. At another  
367 extreme, we also observed several neurons that exhibited monotonic increases in responses to op-  
368 togenetic drive (Fig. 8A, middle row). These results suggest that there are multiple ways in which  
369 interneurons can be interconnected with cortical circuits. The full range of tuning profiles that we  
370 observed is projected onto its first two principle components and plotted in Fig. 8B. Within the pu-  
371 tative inhibitory population, the data are more consistent with a continuum rather than discrete  
372 clusters.

373 The diversity of responses from putative interneurons raises the question as to the nature of the

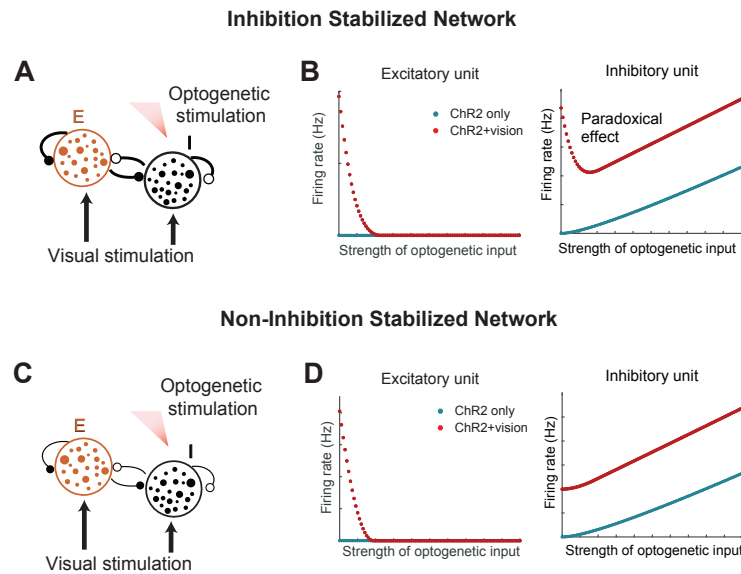

**Figure 7. Differential responses to optogenetic interneuron stimulation in ISN and non-ISN models. A:** In the simulation of ISN ring model (illustrated here as one pair of E and I), the E and the I units have strong recurrent connections. Visual stimulation provides inputs to both the E and the I units, and optogenetic stimulation provides inputs to the I units only. **B (left):** Excitatory unit responses in the ISN. When the inhibitory units are activated by ChR2 stimulation, the excitatory units have no responses. When visual stimulation is provided together with ChR2 stimulation, the excitatory units respond strongly to visual stimulation when the inhibition is weak and reduce firing rates as the inhibition becomes stronger. **B (right):** Inhibitory unit responses in the ISN. When the inhibitory units are activated by ChR2 stimulation but are not otherwise active in the circuit, they monotonically increase firing rates as the stimulation becomes stronger. When ChR2 stimulation is provided in the presence of visual stimulation, the firing rates decrease before increasing, creating a “dip” shape in the response curve that is characteristic of the ISN. **C:** In the simulation of the non-ISN model, the ring structure is maintained as in the ISN but the recurrent connections are weak. **D (left):** Excitatory unit responses in the non-ISN network. Activation of the interneurons suppresses the excitatory unit activity. **D (right):** Inhibitory unit responses in the non-ISN network. In the non-ISN network, the inhibitory units show direct responses to light in a monotonically increasing manner. When ChR2 stimulation is combined with visual stimulation, the inhibitory units also respond in a monotonically increasing manner and the “dip” is absent.

374 overall impact of cortical interneurons on the circuit. Of course, interneuron connectivity could be  
 375 very specific, but as a point of interest we calculated the grand average of the normalized responses  
 376 of all the inhibitory cells to combined optogenetic stimulation and visual stimulation (Fig. 8C). This  
 377 grand average would reflect the inhibitory influence on the cortical network if interneuron types  
 378 were pooled unselectively. The grand average tuning curve exhibits an empirical dip below zero  
 379 for weak external input, although no point on the curve is significantly below 0 with a p-value of  
 380 less than 0.05.

381 Diversity in interneuron responses to optogenetic stimulation could arise from diversity in the re-  
 382 sponse of different inhibitory cell types, due to heterogeneity in neural connections, or due to the  
 383 heterogeneity in the opsin expression across inhibitory cells. We created a large-scale EI network  
 384 model with heterogeneous, randomly distributed connectivity (Fig. S4). We modeled the photocur-  
 385 rent to each cell as a Hill equation as reported experimentally (Asrican et. al. 2018), and the ac-  
 386 tivation of each interneuron to vary with depth, as expected from scattering of light across the  
 387 cortical tissue (Yona et. al. 2018). In this model, we observed a heterogeneous range of response  
 388 profiles in optogenetically-activated interneurons, as in the data. The model not only captures the  
 389 initial response of I cells to laser power, but also the negative correlation between the effect of the  
 390 laser at low intensity and the effect of the laser at high intensity to each cell: If the cell is initially  
 391 excited by the laser, then it tends to quickly saturate for large laser power, whereas if it responds

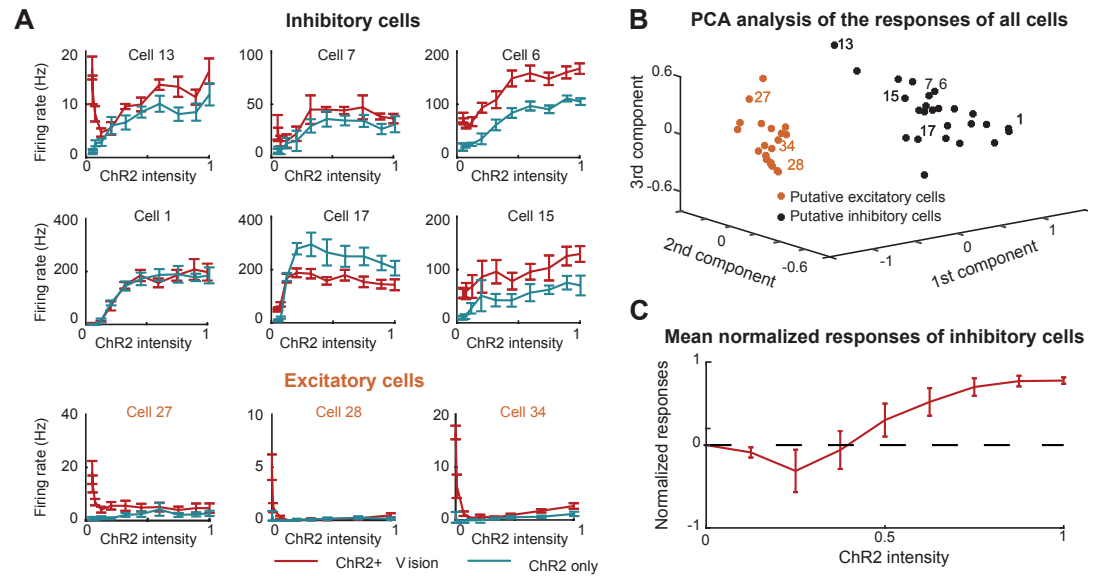

**Figure 8. The influence of direct interneuron stimulation on visual responses in putative excitatory and inhibitory interneurons.** **A:** Representative unit responses from the optogenetic inhibition experiments. Raw mean firing rates (without any background subtraction) are shown for increasing optogenetic stimulation alone (blue) or in the presence of a high contrast visual stimulus (red). (Top) Putative inhibitory neurons that responded like neurons in the ISN simulation. (Middle) Putative inhibitory neurons that did not respond like that the ISN simulation. Instead, the firing rates either saturated or increased at low light intensities and then decreased at high light intensities. (Bottom) Putative excitatory neurons. **B:** Projection of response profiles to visual stimulation and increasing optogenetic interneuron activation onto the first 3 principle components. Putative excitatory and inhibitory neurons are well separated, but there is diversity of responses within the putative inhibitory population. Numbers indicate the example neurons displayed in **A-C**. **C:** The grand average of the normalized ChR2+Vision responses of all putative inhibitory cells. For every inhibitory cell, the responses were normalized in such way that the average response at 0 light intensity is normalized to 0 and the average maximum response is 1.

392 paradoxically to the laser at low power (i.e. if it has a negative response to weak excitatory input)  
 393 then its response does not saturate at large laser power. These results suggest that diversity in  
 394 such properties as synaptic connectivity, optogenetic activation strengths, and cellular thresholds  
 395 could underlie the variable response profiles we observed in Figure 8.

## 396 Discussion

397 In this study, we performed combined visual and patterned optogenetic stimulation to test how  
 398 cortical circuits responded to multiple inputs. We found that cortical stimulation that was optically  
 399 restricted to specific orientation columns caused activity that spread non-selectively to neighbor-  
 400 ing columns. We used this protocol to examine the cortical contributions to contextual modula-  
 401 tion by stimulating different cortical columns visually and optogenetically. We found evidence for  
 402 cross-column cortical normalization, but much less than would be needed for a purely cortical  
 403 mechanism to account for cross-orientation suppression. We found a wide range of interneuron  
 404 couplings to the circuit, including those that responded to weak optogenetic activation by reducing  
 405 their activity, consistent with inhibition stabilized networks.

## 406 Nonspecific spread of activity with respect to orientation columns

407 We tested the spatial spread of optogenetic responses and found that the column-based patterned  
 408 optogenetic stimulation did not respect the boundaries of orientation columns, although local ac-  
 409 tivation was typically restricted around the recorded neuron. While it is difficult to exclude the  
 410 possibility that this unselective spreading is due in part to activation of passing axons and den-

411 drites of neurons in other columns, blocking the NMDA and AMPA receptors revealed that the  
412 influence of horizontal connections played a large role. Viruses that cause strong expression of  
413 ChR2 that is targeted to the soma could help manage concerns about passing dendrites, but the  
414 one soma-targeting virus we were able to try did not cause sufficient expression to produce strong  
415 responses in vivo with our stimulation system (Baker et al., 2016). Our results are consistent with  
416 a study that performed sparse stimulation of nearby orientation columns in tree shrew (Huang  
417 et al., 2014). One might have expected to find species differences between tree shrew and ferret  
418 because the tree shrew primarily exhibits length-summation in layer 2/3 (Chisum et al., 2003) while  
419 ferret exhibits both length-summation and surround suppression (Rubin et al., 2015; Popovic et  
420 al., 2018), but both species showed non-specific spread of activity in layer 2/3.  
421 An important corollary of nonspecific spread is that column-level stimulation of cortical neurons is  
422 unlikely to provide an optimal stand-in for visual activation, e.g. in a visual prosthesis. In addition,  
423 a given visual stimulus causes only a sparse activation of visual cortical neurons (Rocheffort et al.,  
424 2009; Haider et al., 2010; Smith et al., 2015), and there appear to be cells that are not activated  
425 by visual stimulation or are only activated in conjunction with some non-visual stimulus (Saleem  
426 et al., 2018), whereas an optogenetic stimulus will activate all cells in a column. It is possible that  
427 expression of optogenetic channels restricted to LGN axons may allow more specific stimulation  
428 of visually-driven neurons in particular.

### 429 **Linear vs. non-linear interactions of visual and optogenetic signals**

430 Several studies have now examined integration of visual and optogenetic signals.  
431 Huang and colleagues (Huang et al., 2014) used AAV viruses to cause very broad expression of  
432 channelrhodopsin in excitatory neurons in the tree shrew. In these experiments, optogenetic acti-  
433 vation using small spots of light targeted to preferred or orthogonal columns added linearly over  
434 a wide range of firing rates. Further, visual stimulation with the preferred orientation combined  
435 with optogenetic stimulation of preferred columns also showed linear summation.  
436 In macaque, Nassi et al. (2015) used lentivirus to cause more localized expression of C1V1 in exci-  
437 tatory neurons of the macaque. These investigators stimulated broadly with an optical fiber and  
438 observed a variety of facilitatory and suppressive interactions to joint visual stimulation and opto-  
439 genetic stimulation that was not specific to particular columns of the orientation map. The vast  
440 majority of these neurons exhibited sublinear summation of visual and optogenetic signals.  
441 Histed (2018) used transgenic approaches to cause expression of ChR2 in mouse visual cortical  
442 neurons, and found that visual and optogenetic inputs summed in a largely linear manner, though  
443 with sublinear summation at higher firing rates. Another study in the mouse, which used optoge-  
444 netic antidromic activation of callosal inputs, found that callosal inputs facilitated responses at low  
445 visual contrasts but suppressed responses at higher visual contrasts (Sato et al., 2014).  
446 We found evidence for nearly linear summation when neurons exhibited low firing rates, which  
447 became sublinear as neurons exhibited larger firing rates. These results cannot be explained by  
448 a simple process of single cell saturation of firing rate outputs, because marginal increases in or-  
449 thogonal drive produced very different responses in the visual-optogenetic stimulation protocol  
450 as compared to the optogenetic-optogenetic stimulation protocol. This indicates a contribution of  
451 cortical circuits to this integration.

### 452 **In layer 2/3, cross-column suppression is insufficient to account for cross-orientation 453 suppression to visual stimuli**

454 Cortical neurons exhibit weaker responses to a preferred oriented stimulus when the stimulus is  
455 combined with an orthogonally-oriented stimulus (Bishop et al., 1973; Morrone et al., 1982; Bonds,  
456 1989; DeAngelis et al., 1992; Cavanaugh et al., 2002; Smith et al., 2006; Busse et al., 2009; MacEvoy  
457 et al., 2009). Experiments in the last 20 years have shown that direct cross-column inhibition is  
458 unlikely to underlie this phenomenon, as synaptic conductance measurements of both excitatory  
459 and inhibitory inputs peak at the preferred orientation and are relatively weak at the orthogonal



460 orientation (Anderson et al., 2000), and both excitation and inhibition are reduced by the addition  
461 of an orthogonal grating stimulus to a preferred-orientation grating stimulus (Priebe and Ferster,  
462 2006).

463 A more recent model suggested that nonlinear circuit properties induced by supralinear single-cell  
464 input/output functions could explain the change from cross-orientation facilitation for weak stim-  
465 ulti to cross-orientation suppression for stronger stimuli. Furthermore, because the network was  
466 inhibition-stablized for stronger stimuli, the model could explain cross-orientation suppression  
467 with a combined reduction of excitatory and inhibitory conductances (Ozeki et al., 2009; Rubin et  
468 al., 2015). Cross-column excitatory inputs would cause inhibitory neurons to temporarily increase  
469 their firing rates, reducing the firing rates of their neighboring excitatory neurons. Because the  
470 neighboring excitatory neurons themselves provide strong input to their inhibitory neighbors, the  
471 overall firing rates of both excitatory and inhibitory neurons goes down, along with local excitatory  
472 and inhibitory synaptic conductances. Therefore, the model was compatible with the conductance  
473 measurements that did not show strong cross-orientation inhibition (Anderson et al., 2000; Priebe  
474 and Ferster, 2006).

475 Alternatively, other past models suggested that there was no need for any cortical explanation of  
476 cross-orientation suppression. These models suggest that cross-orientation suppression can be  
477 largely accounted for by changes in LGN inputs to V1 cells along with V1 spike threshold (Lauritzen  
478 et al., 2001; Freeman et al., 2002; Li et al., 2006; Priebe and Ferster, 2006; Priebe, 2016).

479 Our optogenetic stimulation results were inconsistent with a cortical explanation for cross-orientation  
480 suppression. Under the hypothesis that optogenetic stimulation is in any way like a visual stim-  
481 ulation, stimulation of orthogonal columns should have produced a strong suppression in the  
482 orthogonal columns. Instead, when we stimulated a set of orientation columns, we observed  
483 a moderate spreading of cortical responses. Combined visual and optogenetic stimulation pro-  
484 duced responses very similar to the linear sum of the individual stimuli for moderate response  
485 strengths, while paired stimulation of visual stimuli of moderate contrast produced strongly sub-  
486 linear responses. In our model that best matched the data, there was some weak cross-column  
487 suppression, but the cross-column suppression was much smaller than is required to produce the  
488 cross-orientation suppression seen using visual stimuli.

### 489 **Inhibition-stabilized dynamics and paradoxical responses**

490 Another goal of our study was to examine whether we could find direct evidence of inhibition-  
491 stabilized dynamics in ferret visual cortex. In inhibition-stabilized dynamics, the cortical circuit acts  
492 as a strong amplifier of external input, such that most of the synaptic drive that impinges on each  
493 cortical cell arises from within the cortex itself (Suarez et al., 1995; Tsodyks et al., 1997; Ozeki et  
494 al., 2009; Rubin et al., 2015). Evidence for inhibition-stabilized dynamics has been observed in  
495 studies of surround suppression in cat visual cortex (Ozeki et al., 2009) and mouse visual cortex  
496 (Sato et al., 2016; Adesnik, 2017; Sanzeni et al., 2020), mouse somatosensory cortex (Sanzeni et  
497 al., 2020), and mouse motor cortex (Sanzeni et al., 2020). Indirect evidence for inhibition-stabilized  
498 dynamics has been observed in ferret visual cortex (Rubin et al., 2015). Sanzeni et al (2020) also  
499 looked for paradoxical responses by direct optogenetic stimulation of interneurons, and found that  
500 paradoxical responses in awake animals could be evoked by stimulating either all interneurons  
501 or just PV neurons when they were targeted in a transgenic manner. Interneuron receptive field  
502 properties differ between species that have columnar features beyond retinotopic maps and those  
503 that only have retinotopic maps; for example, interneurons in cat and ferret visual cortex can be  
504 highly tuned for orientation (Hirsch et al., 2003; Cardin et al., 2007; Wilson et al., 2017), while a  
505 majority of interneurons in mouse visual cortex are not (Sohya et al., 2007; Niell and Stryker, 2008;  
506 Liu et al., 2009; Kerlin et al., 2010). Here we showed that a subset of ferret interneurons also  
507 exhibited characteristic paradoxical behavior with direct stimulation.

508 We observed heterogeneous interneurons responses to increasing optogenetic stimulation. These  
509 responses resemble the heterogenous paradoxical/non-paradoxical responses that Sanzeni et al.

510 (2020) and Mahrach et al (2020) observed in experiments using viral-mediated infection of PV+  
511 neurons. Sanzeni et al. (2020) observed nearly universal paradoxical responses when they used  
512 transgenic methods to express optogenetic channels in either PV+ neurons or all interneurons, via  
513 a VGAT promoter. In ferret, we used a viral promoter that caused expression of ChR2 in a wide  
514 variety of interneuron classes (Dimidschstein et al., 2016), but interneuron subclass-specific viruses  
515 are now becoming available for non-rodents (Mehta et al., 2019; Vormstein-Schneider et al., 2020).  
516 Future experiments will be needed to determine if some of the heterogeneity we observed could  
517 be due to differences in responses of different interneuron subtypes.

## 518 **Materials and Methods**

### 519 **General design.**

520 All experimental procedures were approved by the Brandeis University Animal Care and Use Com-  
521 mittee and performed in compliance with National Institutes of Health guidelines. Eleven adult  
522 ferrets (*Mustela putorius furo*, Marshall Farms; >P90, female) were used in total: five ferrets were  
523 used for patterned optogenetic experiments, four ferrets were used for optogenetic specificity ex-  
524 periments, and four ferrets were used for inhibitory optogenetic experiments. Females were used  
525 exclusively because co-housing male and female adult ferrets in the same space is stressful for  
526 the animals if they are not allowed to mate. For patterned optogenetic and optogenetic specificity  
527 experiments, AAV9.CamKIIa.hChr2(E123T/T159C).mCherry.WPRE.hGH was used to express Chr2  
528 in neurons.

### 529 **Virus injection.**

530 All virus injections were achieved by pre-treating ferrets with ketoprofen (1mg/kg, IM) and tramadol  
531 (2-5mg/kg, oral) on the morning of surgery. The ferrets were anesthetized with ketamine/xylazine  
532 cocktail (20-30mg/kg, 2-3mg/kg) through IM injections and the anesthesia was maintained by ad-  
533 ditional injections of ketamine/xylazine (10-50% amount of ketamine/xylazine used during initial  
534 anesthesia). Atropine (0.16mg/kg) was given to reduce secretions. Ringer's solution (2.75/ml/kg/hr)  
535 was given by subcutaneous injections to prevent dehydration. The body temperature was con-  
536 trolled and monitored by a thermostatic controller (TR-200, Fine Science Tools or PhysioSuite, Kent  
537 Scientific), and the EKG levels were continuously monitored.

538 Ferrets were held in a stereotaxic apparatus by two ear bars and a bite bar. The heads were  
539 shaved and sterilized by alternate applications of Betadine-soaked gauze and 70% isopropanol-  
540 soaked gauze three times. Bupivacaine (0.25-0.5ml of 0.25% with a maximum does of 2mg/kg,  
541 IM) was injected around the incisions on the head. Head muscle and skin were retracted and a  
542 craniotomy, about 1-2 mm wide, was performed. A small durotomy was made with a 31-gauge  
543 needle on a cotton tip applicator. The glass pipettes used to inject viruses were pulled on a vertical  
544 puller (PC100, Narishige) and beveled to achieve a tip about 30um in diameter. Virus was delivered  
545 by a microinjection device (Nanoject, Drummond Scientific) with 22 pulses of 23 nl/pulse with 10  
546 seconds intervals. To achieve a broad expression area ( 2.5 mm<sup>2</sup>), two or three locations were  
547 injected, two depths (300um and 500um below the brain surface) at each location, for each ferret.  
548 After the virus injection, the craniotomy site was covered with an Amniograft membrane (in some  
549 experiments) and the removed skull. The scalp incision was closed with non-absorbable sutures  
550 and the wound site was covered with Neosporin. Animals were returned to the cage with the rest  
551 of the litter after they were ambulatory. Analgesics and antibiotics were administered through 48  
552 hours after surgery.

### 553 **Construction of ProjectorScope 2.**

554 The ProjectorScope 2 (Fig. 1D, Supplementary Fig. 1,2) was built with several modifications of  
555 ProjectorScope 1 (Roy et al., 2016) to achieve wide patterned optogenetic stimulation and intrinsic  
556 signal imaging. Patterned light for optogenetic stimulation was generated by an LCD projector  
557 (NP3250W, NEC) and transmitted onto the brain surface by three single-lens reflex (SLR) lenses of  
558 the same type (Nikon, focal length 50 mm, f/1.2). The original projection lens was replaced with  
559 one of these SLR lenses to reduce misalignment between the projector and the rest of the optical  
560 system. Two juxtaposed lenses (L1; Thorlabs achromat, focal length 30mm, diameter 25mm) were  
561 used to minify the projection image to the appropriate size, 3mm by 3mm, in order to cover the  
562 exposed area in ferret V1. A dichroic mirror (DM; Semrock FF483/639) reflected light between 390-  
563 460 nm to activate Chr2, while allowing green and red light to pass to the CCD camera (Dalsa  
564 camera, 1M60) for intrinsic signal imaging. Intrinsic signal imaging was performed by providing  
565 690-nm light (halide light, Lumen Dynamics, Xcite 200DC, with a filter, Semrock FF01-675/67-25)

566 over the brain surface and taking images of the reflected light using the CCD, with an SLR lens  
567 (Nikon, focal length 135 mm, f/2.8) to bring the image into focus. The maximum power that the  
568 system can provide is approximately 10mW/mm<sup>2</sup> measured at 475 nm by projecting a full-field,  
569 100% contrast white image. ProjectorScope 2 allows three-dimensional adjustments for easier  
570 focus on a curved brain surface (details seen in Supplementary Fig. 1,2).

### 571 **Non-survival surgery.**

572 About 4 weeks after the virus injection, the ferrets were sedated with ketamine (20mg/kg, IM). At-  
573 ropine (0.16mg/kg, IM) and dexamethasone (0.5mg/kg, IM) were administered to reduce bronchial  
574 and salivary secretion and to reduce inflammation, respectively. The animal was anesthetized with  
575 a mixture of isoflurane, oxygen, and nitrous oxide through a mask while a tracheostomy was per-  
576 formed. Animals were then ventilated with 1.5%–3% isoflurane in a 2:1 mixture of nitrous oxide  
577 and oxygen. A cannula was inserted into the intraperitoneal cavity for delivery of neuromuscu-  
578 lar blockers and Ringer's solution (3 ml/kg/hr), and the animal was placed in a custom stereotaxic  
579 frame that did not obstruct vision. The head was fixed with a custom head plate that allowed pitch  
580 adjustments for imaging. All wound margins were infused with bupivacaine. Silicone oil was placed  
581 on the eyes to prevent corneal drying. A craniotomy (4 by 4mm) was made in the right hemisphere  
582 centered around the virus injection site, and the dura was removed with a 31-gauge needle. A  
583 few drops of liquid agarose were applied on the exposed brain surface, and, while the agarose  
584 was still liquid, a pre-drilled coverslip (a hole of about 700um in diameter was drilled through the  
585 coverslip) was mounted on top of the craniotomy area and held until the agarose became solid  
586 (Levy et al., 2012). The coverslip edge was secured using cyanoacrylate glue and excess agarose  
587 on the coverslip was removed. Next, the ferrets were paralyzed with the neuromuscular blocker  
588 gallamine triethiodide (10–30 mg/kg/hr) through the intraperitoneal cannula to suppress sponta-  
589 neous eye movements, and the nitrous oxide-oxygen mixture was adjusted to 1:1. The animal's  
590 ECG was continuously monitored to ensure adequate anesthesia, and the percentage of isoflurane  
591 was increased if the ECG indicated any distress. Body temperature was maintained at 37°C.

### 592 **Visual stimulation.**

593 Visual stimuli were created in MATLAB with the Psychophysics Toolbox on a Macintosh Pro running  
594 OSX and displayed on a Sony monitor (GDM-520). The monitor was placed 35cm in front of the  
595 ferret. Stimuli were full field sine wave gratings with 0.15 spatial frequency and 4Hz temporal  
596 frequency.

597 For intrinsic signal imaging experiments, 100% contrast, bidirectional grating stimuli with orien-  
598 tations varied from 0° to 135° with a step of 45° were played. Each orientation condition was  
599 repeated 20 times with 10s inter-stimulus-interval and 5s stimulus duration.

600 For the optogenetic experiments, visual stimuli were 100% contrast, full-field, with 0.15 spatial  
601 frequency, 4Hz temporal frequency with 8 cycles and repeated 5 times with 3-5s inter-stimulus-  
602 interval. To measure the orientation selectivity, the orientations were varied from 0° to 157.5°  
603 with a step of 22.5°. To measure responses to visual contrast, the orientation was fixed at the  
604 preferred angle and the contrasts were varied as 16%, 32%, 64%, or 100%.

605 Intrinsic signal imaging. Intrinsic signal imaging was performed for some optogenetic experiments  
606 to obtain the orientation column maps. With ProjectorScope 2, 690-nm light illuminated the brain  
607 surface and the reflected light from the brain surface was captured by the camera. The images  
608 were acquired at 30 Hz with custom software in LabVIEW and a National Instruments PCI-1426 ac-  
609 quisition board. The raw images were averaged for every 0.5s and the image that was 0.5s before  
610 the onset of the stimulus was used as the baseline image. The single condition images represent-  
611 ing responses for individual orientations were averaged over all repetitions and the orientation  
612 column map was generated by calculating the vector summation of responses in the single condi-

613 tion images:

$$P = \sum_{k=1}^N R(\theta_k) e^{\frac{2\pi i \theta_k}{180^\circ}} \quad (1)$$

614 where  $R(\theta_k)$  is the responses in a single condition image for a certain orientation stimulus, and  $P$   
615 represents the response of each pixel in the map as a vector summation in the complex plane.

### 616 **Electrophysiology.**

617 In some optogenetic experiments and optogenetic specificity experiments, single barrel carbon  
618 fiber electrodes were used (E1011, Kation Scientific). Such carbon fiber electrodes have very small  
619 tips of about 5um in diameter so they minimize damage to the brain tissue and do not cast shadows  
620 over the stimulated brain area. One electrode was inserted through the hole on the coverslip into  
621 ferret V1, and was lowered to a depth that ranged from 100um to 400um below the brain surface.  
622 The signals were amplified by RHD2132 and collected by the RHD2000 evaluation board (Intan  
623 Technologies).

624 In the inhibitory optogenetic experiments, a custom 32-channel probe (S-probe, Plexon) was used.  
625 Instead of using pre-drilled coverslips, the probe was positioned to just touch the brain surface  
626 and 2

### 627 **Optogenetic receptive zone.**

628 We characterized the optogenetic receptive zone (ORZ) for each patterned optogenetic experiment.  
629 To measure the spatial range of the effective optogenetic stimulation, we projected small dots,  
630 750um in diameter, in a randomized fashion tiling across the entire projection area, 3 by 3 mm<sup>2</sup>,  
631 onto the ferret primary visual cortex that had ChR2 expression. We determined whether a cell's  
632 response at any of the stimulus positions was significantly different from the response to a "blank"  
633 stimulus by performing an ANOVA test ( $P < 0.05$ ). Responses were fitted by a bivariate Gaussian  
634 function to estimate the region over which a cell was strongly activated :

$$R(s) = NR \left\{ \left[ \sum_x \sum_y G(x, y, \mu, \Sigma) I_s(x, y) \right], a, c_{50}, n \right\} \quad (2)$$

635 Where  $I_s(x, y)$  is the intensity at point  $x, y$  for stimulus  $s$ ,  $G(x, y, \mu, \Sigma)$  is the bivariate Gaussian with  
636 mean  $\mu$  and covariance matrix  $\Sigma$ , and  $NR(c, a, c_{50}, n)$  is the Naka-Rushton function:

$$NR(c, a, c_{50}, n) = \frac{ac^n}{c^n + (c_{50})^n} \quad (3)$$

637 Where  $a$  is the maximum cell response,  $c$  is the stimulus intensity, and  $c_{50}$  is the intensity of a  
638 stimulus that produces half of the maximum response. Variables  $a, c_{50}, n, \mu, \Sigma$  were used as free  
639 parameters for the fit. The size of the ORZ was taken to be the full width at half-height (FWHH)  
640 along the major and minor axes of  $G(x, y, \mu, \Sigma)$ .

### 641 **Patterned optogenetic stimulation.**

642 In patterned optogenetic specificity experiments, stimulation masks targeting specific orientation  
643 columns were generated based on the map acquired during intrinsic signal imaging (custom soft-  
644 ware, MATLAB). The preferred orientation of the recorded neuron was identified as the orientation  
645 that evoked the strongest visual responses from the orientation tuning curve. Visual contrast tun-  
646 ing curves were initially measured using 16%, 32%, 64%, or 100% contrast. The optogenetic light  
647 intensity tuning curve were measured by projecting the mask of the ORZ with varying image inten-  
648 sities, 20%, 40%, 60%, 80%. The measurements of these tuning curves were repeated by changing  
649 contrasts or intensities until comparable levels between visual and optogenetic responses were  
650 found, which was usually achieved after 2-3 iterations. Five levels of visual contrasts or light inten-  
651 sities, including 0% contrast and 0% intensity, were chosen for each cell. For the combined visual  
652 and patterned optogenetic stimulation, each visual stimulus was paired with an optogenetic mask

653 stimulus and each pair started at the same time with the optogenetic stimulation lasting for 1s and  
 654 visual stimulation lasting for 2s. The orientation column masks for a given angle were made by in-  
 655 cluding all pixels in the intrinsic signal imaging map that matched the specified angle within some  
 656 tolerance. The tolerance (or thickness) of the column masks was varied by changing the range of  
 657 orientation angles that each column mask contained: 15°, 30°, or 45° tolerance. We found that a  
 658 tolerance of 15° was too small for some cells to evoke enough optogenetic responses and that a tol-  
 659 erance of 45° was too big to create distinctly complementary patterns of inputs, so, in the analysis  
 660 here, we only report the results based on 30° masks. The stimulation order was randomized.  
 661 For all-optogenetic stimulation (Fig. 3A), the masks were created to target either the preferred ori-  
 662 entation columns that were revealed in the orientation columns map, the orthogonal orientation  
 663 columns, or both. For hybrid stimulation (Fig. 3B), the masks were created to target the orthogonal  
 664 orientation columns and the visual stimulus presented the preferred orientation. For the optoge-  
 665 netic specificity experiments, only the orientation columns inside the ORZ were included and the  
 666 masks were created to target the orientations from 0° to 157.5° with a step of 22.5° and a tolerance  
 667 of 15°.

### 668 Pharmacological blocking experiments.

669 To test the hypotheses of optogenetic specificity, an NMDA antagonist (DL-2-Amino-5-phosphonopentanoic  
 670 acid, APV, 1mM- 5mM) and an AMPA antagonist (2,3-Dioxo-6-nitro-1,2,3,4-tetrahydrobenzo[f]quinoxaline-  
 671 7-sulfonamide, NBQX, 100uM-1mM) were used to block NMDA and AMPA receptors. For these  
 672 experiments, the coverslips were pre-drilled with two holes that were 2-3mm apart, one for the  
 673 carbon fiber electrode and one for the blocker pipette. A pulled glass pipette similar to the dimen-  
 674 sion used in virus injections was used to apply the blockers and the blocker solution was delivered  
 675 by Nanoject, with 69nl/pulse, 4 pulses/min, for 14 min, for a total volume of 3.8ul. The effective-  
 676 ness of the blockers was tested by examining visual responses.

### 677 Data analysis.

678 Extracellular data was extracted using 4-5 standard deviations as the threshold and then clustered  
 679 using K-means or KlustaKwik based on either two-point features (for the single barrel carbon fiber  
 680 electrode recordings) or the principal components (for the S-probe recordings). In the patterned  
 681 optogenetic experiments, the firing rates were calculated as spike counts from the 0.5s-1s after the  
 682 onset of the stimuli divided by 0.5s duration, because the firing rates reached the steady states  
 683 after 500ms of stimulation. In the inhibitory optogenetic experiments, the calculations of firing  
 684 rates were based on the entire 1s duration of paired stimulation.

685 To analyze the optogenetic specificity, the specificity index is defined as 1-circular variance (Ringach  
 686 et al., 2002; Mazurek et al., 2014), calculated as:

$$1 - \text{CirVar} = \frac{\sum_k R(\theta_k) e^{2i\theta_k}}{\sum_k R(\theta_k)} \quad (4)$$

687 Where  $R(\theta_k)$  is the response to angle  $\theta_k$ . The comparison between the specificity before and after  
 688 blockers applications was based on two-sample t-test.

689 To calculate the Marginal Orthogonal Drive Angle (MODA), we created an weighted vector that  
 690 described the influence of adding extra orthogonal drive to the linearity of a cell's response. We  
 691 denote the response of a cell to a preferred contrast  $C_{\text{pref}}$  and orthogonal contrast  $C_{\text{orth}}$  as  $R(C_{\text{pref}}, C_{\text{orth}})$ .  
 692 The linear prediction for the response of the cell is  $LP(C_{\text{pref}}, C_{\text{orth}}) = R(C_{\text{pref}}, 0) + R(0, C_{\text{orth}})$ .  
 693 The change in linearity was computed for each pair of presented orthogonal contrasts  $C_{\text{orth}}^j, C_{\text{orth}}^k$   
 694 (where the contrast  $C_{\text{orth}}^k$  must be greater than  $C_{\text{orth}}^j$ ) as a vector

$$V(C_{\text{pref}}, C_{\text{orth}}^j, C_{\text{orth}}^k) = \begin{bmatrix} \Delta LP \\ \Delta R \end{bmatrix} = \begin{bmatrix} LP(C_{\text{pref}}, C_{\text{orth}}^k) - LP(C_{\text{pref}}, C_{\text{orth}}^j) \\ R(C_{\text{pref}}, C_{\text{orth}}^k) - R(C_{\text{pref}}, C_{\text{orth}}^j) \end{bmatrix} \quad (5)$$

695 To compute an accurate estimate of the Marginal Orthogonal Drive, we computed this quantity  
 696 over the 2 highest preferred orientation contrasts, and for all pairs of orthogonal contrasts (there  
 697 were 4 orthogonal contrasts, so there are 6 pairs of orthogonal contrasts where the second is  
 698 greater than the first). Further, we normalized the contribution of each vector to the overall Marginal  
 699 Orthogonal Drive by the change in orthogonal contrast, reasoning that if we added an extra amount  
 700 (say, twice) of orthogonal stimulus contrast to one pair of stimuli as compared to another pair, we  
 701 ought to divide the contribution by that extra amount (say, by 2) to normalize the contribution of  
 702 the contrasts used, so that the vector has units of change in response per unit contrast. The total  
 703 Marginal Orthogonal Drive vector was thus:

$$\vec{V} = \sum_{i=1}^2 \sum_{j=1}^3 \sum_{k=j+1}^4 \frac{\vec{V} \left( C_{\text{pref}}^i, C_{\text{orth}}^j, C_{\text{orth}}^k \right)}{C_{\text{orth}}^k - C_{\text{orth}}^j} \quad (6)$$

704 where  $i$  represents the two highest contrasts of the preferred stimulus, and  $j$  and  $k$  represent the  
 705 levels of orthogonal contrast from which the starting data point and the ending data point of a  
 706 vector are found.

707 The Marginal Orthogonal Drive Length is then

$$\text{MODL} = \sqrt{V[1]^2 + V[2]^2} \quad (7)$$

708 and the Marginal Orthogonal Drive Angle is

$$\text{MODA} = \tan^{-1} \left( \frac{V[2]}{V[1]} \right) \quad (8)$$

709 where  $V[i]$  is the  $i$ th dimension of the vector  $V$ .

710 The Linearity index is the slope of the best linear fit line of  $R$  and  $LP$  (in the least squares sense)  
 711 that passes through all responses under all contrasts and must pass through the origin.

## 712 Ring model simulations.

713 The ring models consisted of 180 E and I cells, placed along a ring. Each position was given a label  
 714  $\theta_i = 0 \dots 179^\circ$ . The steady-state response of each cell was given by the equation from Rubin et al.  
 715 2015:

$$r_i^{ss} = 0.04 \left[ \sum_{j=1}^N w_{ij} r_j + h_i \right]_+^2 \quad (9)$$

716 where  $w_{ij}$  is the connection from neuron  $j$  to neuron  $i$ , and  $h_i$  is the sum of visual (hvisual) and  
 717 optogenetic (hopto) input to neuron  $i$ . The connections from e-to-e neurons had a weight  $W_{EE}$  that  
 718 fell off in a Gaussian manner with angular distance around the ring as  $\sigma_{EE}$ . Similarly, connections  
 719 from i-to-e had a value  $W_{EI}$  that fell off with  $\sigma_{EI}$ , connections from e-to-i had a value  $W_{IE}$  that fell  
 720 off with  $\sigma_{IE}$ , and i-to-i connections had a weight  $W_{II}$  that fell off with  $\sigma_{II}$ . The following differential  
 721 equation was solved numerically using Euler's method:

$$\tau_i \frac{dr_i}{dt} = -r_i + r_i^{ss} \quad (10)$$

722 where  $\tau_i$  is 200ms for excitatory cells and 100ms for inhibitory cells. Visual stimulation at an angle  
 723  $\theta$  was delivered to each neuron with a strength of 1 and a Gaussian falloff of  $30^\circ$ .

724 The details of the connections and optogenetic input differed by model. For Model 1,  $W_{EE}$  was  
 725 0.018,  $W_{EI}$  was -0.0094,  $W_{IE}$  was 0.0171,  $W_{II}$  was -0.0073, and  $\sigma_{EE} = \sigma_{IE} = \sigma_{EI} = \sigma_{II} = 32^\circ$ . Opto-  
 726 genetic input was delivered to each neuron with a strength of 1 and a Gaussian falloff of  $45^\circ$  from  
 727 the angle of columnar stimulation  $\theta$ .

728 For Model 2, the parameters were the same as Model 1, except that visual and optogenetic inputs  
 729 to inhibitory neurons were slightly increased (to 1.1), and  $\sigma_{EE} = \sigma_{IE} = \sigma_{II} = 10^\circ$ , while  $\sigma_{EI}$  was  
 730 dropped to  $25^\circ$

731 For Model 3, the parameters were the same as Model 2, except that optogenetic input was modeled  
 732 differently. The orthogonal input was modeled as the sum of  $\frac{1}{2}$  the Gaussian fall off as before and a  
 733 constant input of 0.5 at all  $\theta_i$ , and the preferred input included an additional 0.2 input to inhibitory  
 734 neurons to reflect the fact that the preferred optogenetic stimulation included the region right  
 735 around the electrode (which was omitted in the orthogonal input). That is, the input to excitatory  
 736 neurons was given as the real part of the following equations, and the input to inhibitory neurons  
 737 was given as the imaginary part of the following equations:

$$h_{\text{opto}}^{\text{orth}} = (1 + 1.1i)(0.5G(1, 45^\circ) + 0.5) \quad (11)$$

$$h_{\text{opto}}^{\text{pref}} = (1 + 1.1i)(0.5G(1, 45^\circ) + 0.5) + 0.2i \quad (12)$$

### 738 Heterogeneous network simulations.

739 To simulate the impact of optogenetic stimulation in a heterogeneous network with variable opto-  
 740 genetic activation and variable synaptic weights, we simulated a column with 2 populations with  $N$   
 741 neurons in it, each with steady-state rate  $\vec{r}$  given by:

$$\vec{r} = \phi(W\vec{r} + \vec{h}) \quad (13)$$

742 Where the function  $\phi$  is a modified rectified power law function  $\phi(x) = (\alpha x)^n / (1 + (x + \alpha)^n)$ , which  
 743 saturates for  $x \rightarrow \infty$  and behaves similarly to the standard rectified power law or small values  
 744 of  $x$ . We chose  $\alpha = 35$  and  $n = 2$ . The connectivity elements are sparse with sparsity  $p = 0.3$ .  
 745 The nonzero elements of  $W$  are  $w_{ee} = 1$ ,  $w_{ei} = 1.1$ ,  $w_{ie} = 0.89$ ,  $w_{ii} = 0.91$  and they scale as  $1/N$  with the  
 746 network size.

747 The external inputs to each neuron  $h_i^\alpha$  have a baseline component and an optogenetic input, such  
 748 that

$$h_i^\alpha = h_i^{\text{b},\alpha} + I_i^{\text{Chr2}}(x)\delta_{\alpha I} \quad (14)$$

749 The baseline was uniformly distributed  $h^{\text{b},\alpha}$ , centered in  $\mu_{hb} = 10$  and with a width  $\sigma_{hb} = 6$  for both  
 750 cell types. The optogenetic input only affects inhibitory neurons and is defined below.

### 751 Model of Optogenetic Perturbations

752 There were two main sources of photocurrent heterogeneity, one being light dispersion through  
 753 the tissue and the second one being the number or Chr2 channels that are expressed in each cell.  
 754 Regarding the first one the amount of light that reaches the cells decays exponentially with distance  
 755 (Yona et. al. 2016). We assumed that the recorded neurons are homogeneously distributed in the  
 756  $z$  axis of the probe. The light that arrived to each neuron was given by

$$I_i(x) = 2x \exp\left(\frac{-z_i}{\lambda}\right) \quad \text{with} \quad z_i \sim U(0, 1) \quad (15)$$

757 Where  $x$  is the light intensity at the surface,  $z_i$  is the distance of the cell  $i$  from the surface, and  $\lambda$   
 758 is the spatial scale (We took  $\lambda = 2$ ). We assumed that, each channel had an input output function  
 759 that is given by a Hill Equation and that each channel had a different threshold, given by  $I_i^0$

$$H_i(x) = \frac{(I_i(x) - I_i^0)^\gamma}{1 + (I_i(x) - I_i^0)^\gamma} \quad (16)$$

760 With  $I_i^0 = I_i(x_0)$ , with  $x_0 \sim \mathcal{N}(\mu_{x_0}, \sigma_{x_0})$ . The values were chosen to be  $\mu_{x_0} = -0.05$  while  $\sigma_{x_0} = 0.001$ .  
 761 The second source of heterogeneity is the number of Chr2 channels that are expressed with the  
 762 virus, that we assume to be gaussian distributed. In the simulations, we didn't specify the number  
 763 of channels, but we used a normalized number distributed as  $\kappa c \sim \mathcal{N}(\mu_c, \sigma_c)$  with  $\mu_c = 72$  and  $\sigma_c = 8$



764 Each individual channel contributed independently and identically to the photocurrent such that  
765 the total input to the cell was

$$I_i^{\text{Chr2}}(x) = \kappa c_i (H_i(x) - H_i(0)) \quad (17)$$

766 Where the subtraction by  $H_i(0)$  guaranteed that the effect of the laser at zero intensity ( $x=0$ ) was  
767 0.

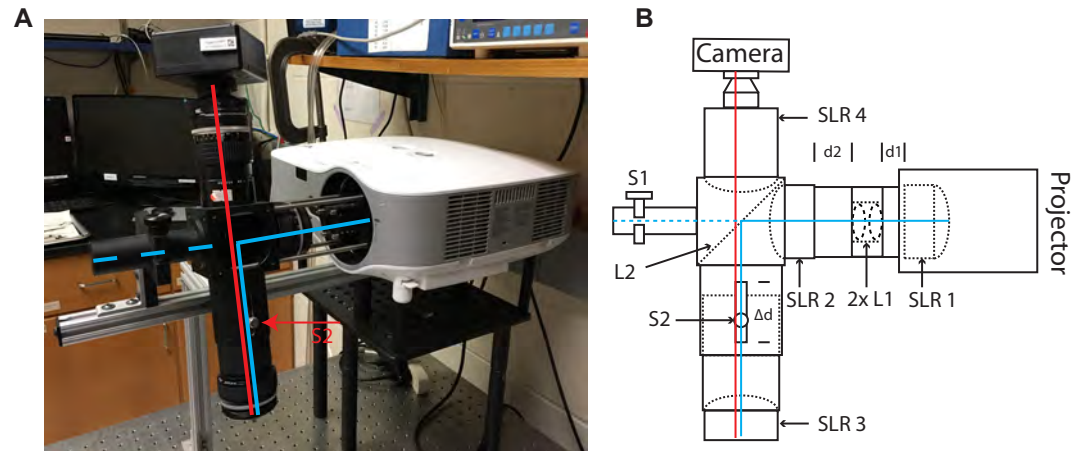

**Figure S1. ProjectorScope 2.** ProjectorScope 2 on the experimental table. The blue axis represents the direction of the outgoing light from the projector reflected by a dichroic mirror. The red axis represents the direction along which light travels from the brain surface to the camera during intrinsic signal imaging. The red arrow points to the tube that provides translation along the red axis using set screw S2. **B.** A schematic of ProjectorScope 2. SLR, single-reflex lens; S1, screw 1; S2, screw 2; 2x L1, two closely placed achromat lenses; L2, dichroic mirror;  $d_1=30\text{mm}$ ;  $d_2=45\text{mm}$ ;  $\Delta d = 6\text{cm}$ .

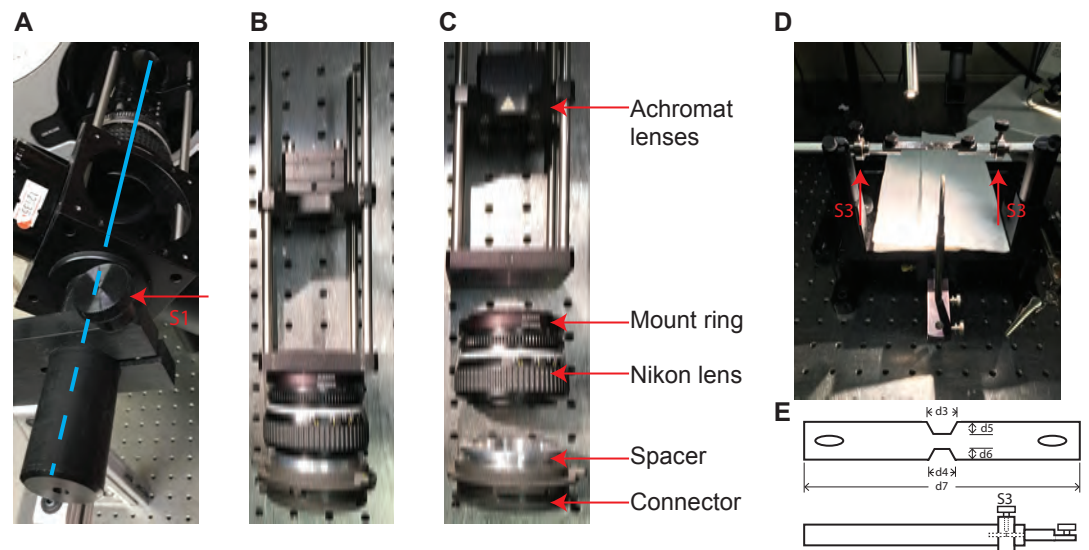

**Figure S2. Components of ProjectorScope 2 and the custom head-plate and head-bars.** **A.** The cylindrical bar that allows the cube to rotate around the blue axis. The knob S1 controls the rotation of the bar. **B.** The replaced projection lens with all components connected. **C.** A disconnected version of B, which separately displays the connector to the projector, the spacer, the Nikon lens, and the custom-made mount ring that connects the Nikon lens to the Thorlabs rectangular connector. **D.** The rotatable headplate. The red arrows point to the rotatable parts, S3, that can adjust the animal's head pitch angle. Combining the controllable parts in S1, S2, and S3, ProjectorScope 2 allows three-dimensional adjustments for easier focus on a curved brain surface. **E.** Schematics of the head-plate and the head-bar. The head-plate, 1mm thick, has two half-hexagon notches to easily fit the curved skull surface.  $d_3=7\text{mm}$ ,  $d_5=2\text{mm}$ ,  $d_4=5\text{mm}$ ,  $d_6=1.5\text{mm}$ ,  $d_7=6.5\text{cm}$ . The head-bar provides rotation by adjusting S3.

Supplementary Figure 8-1

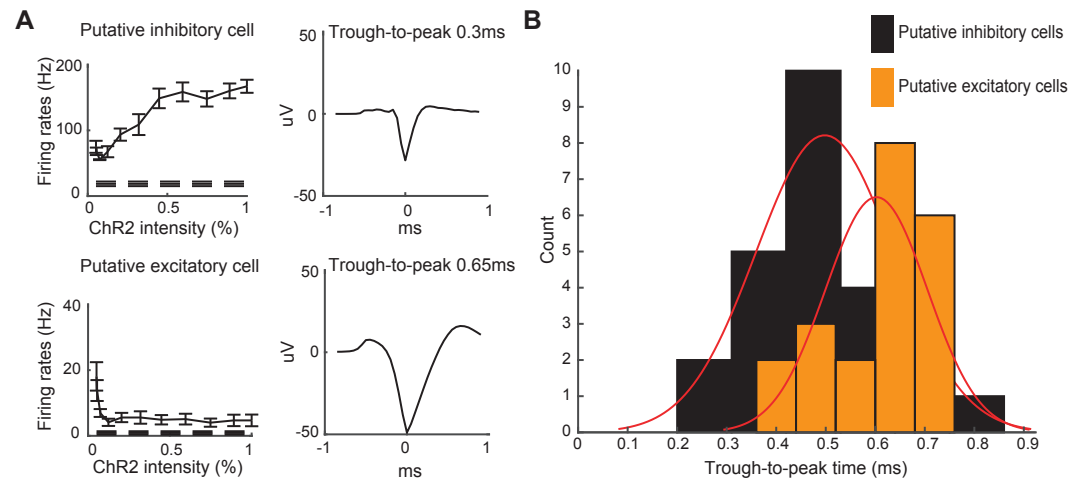

**Figure S3. Optogenetic stimulation of ferrets expressing mDlx-ChR2 revealed neurons with putative excitatory and inhibitory signatures.** **A.** Left) Responses of an example putative inhibitory cell (top) that shows direct activation by light stimulation, and a putative excitatory cell (bottom) that is strongly inhibited by light. Raw responses are shown, without visual stimulation, and without any subtraction of background firing rates (dashed line). Right) Zoomed-in views of the average action potential waveform from each neuron along with the trough-to-peak time. **B.** Histograms of trough-to-peak times of putative inhibitory cells and putative excitatory cells. Cells' identities were first determined by their response profiles to optogenetic stimulation and then the trough-to-peak times were calculated and summarized. Gaussian density fits to the histograms are shown in red. On average, the putative excitatory cells showed longer spike durations than the inhibitory cells, although there were putative inhibitory cells that exhibited wider spikes, consistent with the variety of interneuron types found in cortex (fast-spiking and regular-spiking).

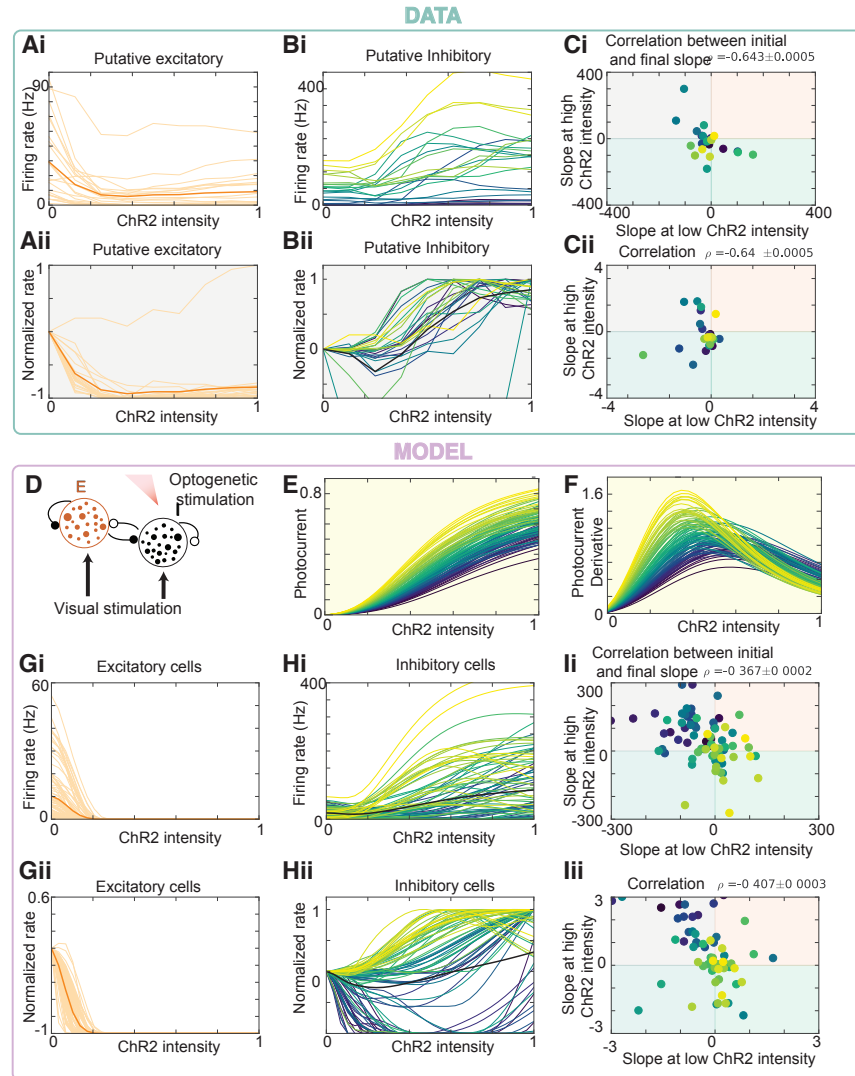

**Figure S4. Optogenetic stimulation of ferrets expressing mDlx-ChR2 revealed neurons with putative excitatory and inhibitory signatures.** TOP: **Ai**: Putative excitatory cells (as defined in Fig. S3.) as a function of the intensity of the optogenetic input to the inhibitory cells. **Aii**: Same as Ai but normalized such that the curves start from zero and were maximal at 1 (as in Fig. 8c). **Bi**: and **Bii**: Putative inhibitory cells. The paradoxical effect (i.e. that some cells decrease their activity upon optogenetic drive) is better revealed by normalizing the cells. **Ci**: The slope of each cells response to a weak laser input is negatively correlated with the slope at a large laser input. In other words, the cells that did not respond paradoxically tended to saturate at smaller laser intensities. **Cii**: Negative correlation for normalized responses. BOTTOM: **D**: Heterogeneous model with N neurons (N=500 in simulations). **E**: Model of optogenetic current for each cell as a function of laser intensity as given by Eq. 17. **F**: Derivative of the photocurrent. **Gi**: Excitatory cells as a function of the intensity of the optogenetic input to the inhibitory cells. **Gii**: Same as Ai but normalized such that the curves start from zero and are maximal at 1. **Hi**: and **Hii**: Inhibitory cells. The paradoxical effect in the model is better revealed by normalizing the cells, as in the data. **Ii**: and **Iii**: The model captures the negative correlation between the slope in response to a weak laser and the slope at a large laser input for both normalized and non-normalized responses.

## References

- 768  
769 1. Adelson EH, Movshon JA (1982) Phenomenal coherence of moving visual patterns. *Nature*  
770 300:523-525.
- 771 2. Adesnik H (2017) Synaptic Mechanisms of Feature Coding in the Visual Cortex of Awake Mice.  
772 *Neuron* 95:1147-1159 e1144.
- 773 3. Ahmadian Y, Rubin DB, Miller KD (2013) Analysis of the stabilized supralinear network. *Neural*  
774 *Comput* 25:1994-2037.
- 775 4. Anderson JS, Carandini M, Ferster D (2000) Orientation tuning of input conductance, excita-  
776 tion, and inhibition in cat primary visual cortex. *J Neurophysiol* 84:909-926.
- 777 5. Anderson JS, Lampl I, Gillespie DC, Ferster D (2001) Membrane potential and conductance  
778 changes underlying length tuning of cells in cat primary visual cortex. *J Neurosci* 21:2104-  
779 2112.
- 780 6. Asrican, Brent, et al. "Next-generation transgenic mice for optogenetic analysis of neural  
781 circuits." *Frontiers in neural circuits* 7 (2013): 160.
- 782 7. Baker CA, Elyada YM, Parra A, Bolton MM (2016) Cellular resolution circuit mapping with  
783 temporal-focused excitation of soma-targeted channelrhodopsin. *eLife* 5.
- 784 8. Berndt A, Schoenenberger P, Mattis J, Tye KM, Deisseroth K, Hegemann P, Oertner TG (2011)  
785 High-efficiency channelrhodopsins for fast neuronal stimulation at low light levels. *Proc Natl*  
786 *Acad Sci U S A* 108:7595-7600.
- 787 9. Bishop PO, Coombs JS, Henry, H. G (1973) Receptive fields of simple cells in the cat striate  
788 cortex. *J Physiol* 231:31-60.
- 789 10. Blasdel GG, Salama G (1986) Voltage-sensitive dyes reveal a modular organization in monkey  
790 striate cortex. *Nature* 321:579-585.
- 791 11. Bonds AB (1989) Role of inhibition in the specification of orientation selectivity of cells in the  
792 cat striate cortex. *Vis Neurosci* 2:41-55.
- 793 12. Boyden ES, Zhang F, Bamberg E, Nagel G, Deisseroth K (2005) Millisecond-timescale, geneti-  
794 cally targeted optical control of neural activity. *Nat Neurosci* 8:1263-1268.
- 795 13. Busse L, Wade AR, Carandini M (2009) Representation of concurrent stimuli by population  
796 activity in visual cortex. *Neuron* 64:931-942.
- 797 14. Carandini M, Heeger DJ (2011) Normalization as a canonical neural computation. *Nat Rev*  
798 *Neurosci* 13:51-62.
- 799 15. Carandini M, Heeger DJ, Movshon JA (1997) Linearity and Normalization in Simple Cells of the  
800 Macaque Primary visual Cortex. *J Neurosci* 17:8621-8644.
- 801 16. Cardin JA, Palmer LA, Contreras D (2007) Stimulus feature selectivity in excitatory and in-  
802 hibitory neurons in primary visual cortex. *J Neurosci* 27:10333-10344.
- 803 17. Cavanaugh JR, Bair W, Movshon JA (2002) Nature and interaction of signals from the receptive  
804 field center and surround in macaque V1 neurons. *J Neurophysiol* 88:2530-2546.
- 805 18. Chisum HJ, Mooser F, Fitzpatrick D (2003) Emergent properties of layer 2/3 neurons reflect  
806 the collinear arrangement of horizontal connections in tree shrew visual cortex. *J Neurosci*  
807 23:2947-2960.
- 808 19. Das A, Gilbert CD (1999) Topography of contextual modulations mediated by short-range  
809 interactions in primary visual cortex. *Nature* 399:655-661.
- 810 20. DeAngelis GC, Robson JG, Ohzawa I, Freeman RD (1992) Organization of suppression in re-  
811 ceptive fields of neurons in cat visual cortex. *J Neurophysiol* 68:144-163.
- 812 21. Dimidschstein J et al. (2016) A viral strategy for targeting and manipulating interneurons  
813 across vertebrate species. *Nat Neurosci* 19:1743-1749.
- 814 22. Freeman TC, Durand S, Kiper DC, Carandini M (2002) Suppression without inhibition in visual  
815 cortex. *Neuron* 35:759-771.
- 816 23. Grinvald A, Lieke E, Frostig RD, Gilbert CD, Wiesel TN (1986) Functional architecture of cortex  
817 revealed by optical imaging of intrinsic signals. *Nature* 324:361-364.

- 818 24. Haider B, Krause MR, Duque A, Yu Y, Touryan J, Mazer JA, McCormick DA (2010) Synaptic  
819 and network mechanisms of sparse and reliable visual cortical activity during nonclassical  
820 receptive field stimulation. *Neuron* 65:107-121.
- 821 25. Heeger DJ (1992) Normalization of cell responses in cat striate cortex. *Vis Neurosci* 9:181-198.
- 822 26. Heuer HW, Britten KH (2002) Contrast dependence of response normalization in area MT of  
823 the rhesus macaque. *J Neurophysiol* 88:3398-3408.
- 824 27. Hirsch JA, Martinez LM, Pillai C, Alonso JM, Wang Q, Sommer FT (2003) Functionally distinct  
825 inhibitory neurons at the first stage of visual cortical processing. *Nat Neurosci* 6:1300-1308.
- 826 28. Histed MH (2018) Feedforward Inhibition Allows Input Summation to Vary in Recurrent Corti-  
827 cal Networks. *eNeuro* 5.
- 828 29. Huang X, Elyada YM, Bosking WH, Walker T, Fitzpatrick D (2014) Optogenetic assessment of  
829 horizontal interactions in primary visual cortex. *J Neurosci* 34:4976-4990.
- 830 30. Katzner S, Busse L, Carandini M (2011) GABAA inhibition controls response gain in visual cor-  
831 tex. *J Neurosci* 31:5931-5941.
- 832 31. Kerlin AM, Andermann ML, Berezovskii VK, Reid RC (2010) Broadly tuned response properties  
833 of diverse inhibitory neuron subtypes in mouse visual cortex. *Neuron* 67:858-871.
- 834 32. Lauritzen TZ, Krukowski AE, Miller KD (2001) Local correlation-based circuitry can account for  
835 responses to multi-grating stimuli in a model of cat V1. *J Neurophysiol* 86:1803-1815.
- 836 33. Levy M, Schramm AE, Kara P (2012) Strategies for mapping synaptic inputs on dendrites in  
837 vivo by combining two-photon microscopy, sharp intracellular recording, and pharmacology.  
838 *Front Neural Circuits* 6:101.
- 839 34. Li B, Thompson JK, Duong T, Peterson MR, Freeman RD (2006) Origins of cross-orientation  
840 suppression in the visual cortex. *J Neurophysiol* 96:1755-1764.
- 841 35. Litwin-Kumar A, Rosenbaum R, Doiron B (2016) Inhibitory stabilization and visual coding in  
842 cortical circuits with multiple interneuron subtypes. *J Neurophysiol* 115:1399-1409.
- 843 36. Liu BH, Li P, Li YT, Sun YJ, Yanagawa Y, Obata K, Zhang LI, Tao HW (2009) Visual receptive field  
844 structure of cortical inhibitory neurons revealed by two-photon imaging guided recording. *J*  
845 *Neurosci* 29:10520-10532.
- 846 37. MacEvoy SP, Tucker TR, Fitzpatrick D (2009) A precise form of divisive suppression supports  
847 population coding in the primary visual cortex. *Nat Neurosci* 12:637-645.
- 848 38. Mahrach A, Chen G, Li N, van Vreeswijk C, Hansel D (2020) Mechanisms underlying the re-  
849 sponse of mouse cortical networks to optogenetic manipulation. *eLife* 9.
- 850 39. Mazurek M, Kager M, Van Hooser SD (2014) Robust quantification of orientation selectivity  
851 and direction selectivity. *Front Neural Circuits* 8:92.
- 852 40. Mehta P, Kreeger L, Wylie DC, Pattadkal JJ, Lusignan T, Davis MJ, Turi GF, Li WK, Whitmire MP,  
853 Chen Y, Kajs BL, Seidemann E, Priebe NJ, Losonczy A, Zemelman BV (2019) Functional Access  
854 to Neuron Subclasses in Rodent and Primate Forebrain. *Cell Rep* 26:2818-2832 e2818.
- 855 41. Morrone MC, Burr DC, Maffei L (1982) Functional implications of cross-orientation inhibition  
856 of cortical visual cells. I. Neurophysiological evidence. *Proc R Soc Lond B* 216:335-354.
- 857 42. Morrone MC, Burr DC, Speed HD (1987) Cross-orientation inhibition in cat is GABA mediated.  
858 *Exp1 Brain Res* 67:635-644.
- 859 43. Nassi JJ, Avery MC, Cetin AH, Roe AW, Reynolds JH (2015) Optogenetic Activation of Normal-  
860 ization in Alert Macaque Visual Cortex. *Neuron* 86:1504-1517.
- 861 44. Niell CM, Stryker MP (2008) Highly selective receptive fields in mouse visual cortex. *J Neurosci*  
862 28:7520-7536.
- 863 45. Ozeki H, Finn IM, Schaffer ES, Miller KD, Ferster D (2009) Inhibitory stabilization of the cortical  
864 network underlies visual surround suppression. *Neuron* 62:578-592.
- 865 46. Palmigiano A, Fumarola F, Mossing DP, Kravnyukova N, Adesnik H, Miller KD (2020) Structure  
866 and variability of optogenetic responses identify the operating regime of cortex. *bioRxiv:2020.2011.201*
- 867 47. Popovic M, Stacy AK, Kang M, Nanu R, Oettgen CE, Wise DL, Fiser J, Van Hooser SD (2018)  
868 Development of Cross-Orientation Suppression and Size Tuning and the Role of Experience.

- 869 J Neurosci 38:2656-2670.
- 870 48. Priebe NJ (2016) Mechanisms of Orientation Selectivity in the Primary Visual Cortex. *Annu*  
871 *Rev Vis Sci* 2:85-107.
- 872 49. Priebe NJ, Ferster D (2006) Mechanisms underlying cross-orientation suppression in cat visual  
873 cortex. *Nat Neurosci* 9:552-561.
- 874 50. Reynolds JH, Heeger DJ (2009) The normalization model of attention. *Neuron* 61:168-185.
- 875 51. Ringach DL, Shapley RM, Hawken MJ (2002) Orientation selectivity in macaque V1: diversity  
876 and laminar dependence. *J Neurosci* 22:5639-5651.
- 877 52. Rochefort NL, Garaschuk O, Milos RI, Narushima M, Marandi N, Pichler B, Kovalchuk Y, Kon-  
878 nerth A (2009) Sparsification of neuronal activity in the visual cortex at eye-opening. *Proc Natl*  
879 *Acad Sci U S A* 106:15049-15054.
- 880 53. Roy A, Osik JJ, Ritter NJ, Wang S, Shaw JT, Fiser J, Van Hooser SD (2016) Optogenetic spatial  
881 and temporal control of cortical circuits on a columnar scale. *J Neurophysiol* 115:1043-1062.
- 882 54. Rubin DB, Van Hooser SD, Miller KD (2015) The stabilized supralinear network: a unifying  
883 circuit motif underlying multi-input integration in sensory cortex. *Neuron* 85:402-417.
- 884 55. Saleem AB, Diamanti EM, Fournier J, Harris KD, Carandini M (2018) Coherent encoding of  
885 subjective spatial position in visual cortex and hippocampus. *Nature* 562:124-127.
- 886 56. Sanzeni A, Akitake B, Goldbach HC, Leedy CE, Brunel N, Histed MH (2020) Inhibition stabiliza-  
887 tion is a widespread property of cortical networks. *eLife* 9.
- 888 57. Sato TK, Hausser M, Carandini M (2014) Distal connectivity causes summation and division  
889 across mouse visual cortex. *Nat Neurosci* 17:30-32.
- 890 58. Sato TK, Haider B, Hausser M, Carandini M (2016) An excitatory basis for divisive normaliza-  
891 tion in visual cortex. *Nat Neurosci* 19:568-570.
- 892 59. Shushruth S, Mangapathy P, Ichida JM, Bressloff PC, Schwabe L, Angelucci A (2012) Strong  
893 recurrent networks compute the orientation tuning of surround modulation in the primate  
894 primary visual cortex. *J Neurosci* 32:308-321.
- 895 60. Simoncelli EP, Heeger DJ (1998) A model of neuronal responses in visual area MT. *Vision Res*  
896 38:743-761.
- 897 61. Smith GB, Sederberg A, Elyada YM, Van Hooser SD, Kaschube M, Fitzpatrick D (2015) The  
898 development of cortical circuits for motion discrimination. *Nat Neurosci* 18:252-261.
- 899 62. Smith MA, Bair W, Movshon JA (2006) Dynamics of suppression in macaque primary visual  
900 cortex. *J Neurosci* 26:4826-4834.
- 901 63. Sohya K, Kameyama K, Yanagawa Y, Obata K, Tsumoto T (2007) GABAergic neurons are less  
902 selective to stimulus orientation than excitatory neurons in layer II/III of visual cortex, as re-  
903 vealed by in vivo functional Ca<sup>2+</sup> imaging in transgenic mice. *J Neurosci* 27:2145-2149.
- 904 64. Suarez H, Koch C, Douglas R (1995) Modeling direction selectivity of simple cells in striate  
905 visual cortex within the framework of the canonical microcircuit. *J Neurosci* 15:6700-6719.
- 906 65. Tsodyks MV, Skaggs WE, Sejnowski TJ, McNaughton BL (1997) Paradoxical effects of external  
907 modulation of inhibitory interneurons. *J Neurosci* 17:4382-4388.
- 908 66. Vormstein-Schneider D et al. (2020) Viral manipulation of functionally distinct interneurons  
909 in mice, non-human primates and humans. *Nat Neurosci* 23:1629-1636.
- 910 67. Wilson DE, Smith GB, Jacob AL, Walker T, Dimidschstein J, Fishell G, Fitzpatrick D (2017) GABAer-  
911 gic Neurons in Ferret Visual Cortex Participate in Functionally Specific Networks. *Neuron*  
912 93:1058-1065 e1054.
- 913 68. Yona, G., Meitav, N., Kahn, I. & Shoham, S. Realistic numerical and analytical modeling of light  
914 scattering in brain tissue for optogenetic applications. *eNeuro* 3, 420-424 (2016).
